# Supplementary material for: Pitfalls and Possibilities of Patinated Bronze: The Analysis of Pre-Roman Italian Armour Using pXRF
Source: MDPI journal article supplement (doi:10.3390/min11070697), 2021-06-29
Supplement: s1 [file s1]

Archive with 2 entries (2 files):
- S1_Assay Locations.pdf
- S2_Data.csv
