# Supplementary material for: Pitfalls and Possibilities of Patinated Bronze: The Analysis of Pre-Roman Italian Armour Using pXRF
Source: MDPI journal article supplement (doi:10.3390/min11070697), 2021-06-29
Supplement: s1 [file s1 › S1_Assay Locations.pdf]

## **Measuring the elemental composition of early Italian bronze military equipment using pXRF**

### **S1. Assay Locations**

Following are the locations of assays on each object discussed in the text. Reference figures were captured from photogrammetry models, the methods for the creation of which are outlined in Emmitt et al. (2021). Assay numbers presented as a range represent cluster assays. Not all assays depicted are used in this analysis but are presented for reference. Due to logistical issues photogrammetry was not undertaken on VG004, VG011, VG016 and as such annotated photographs are presented.

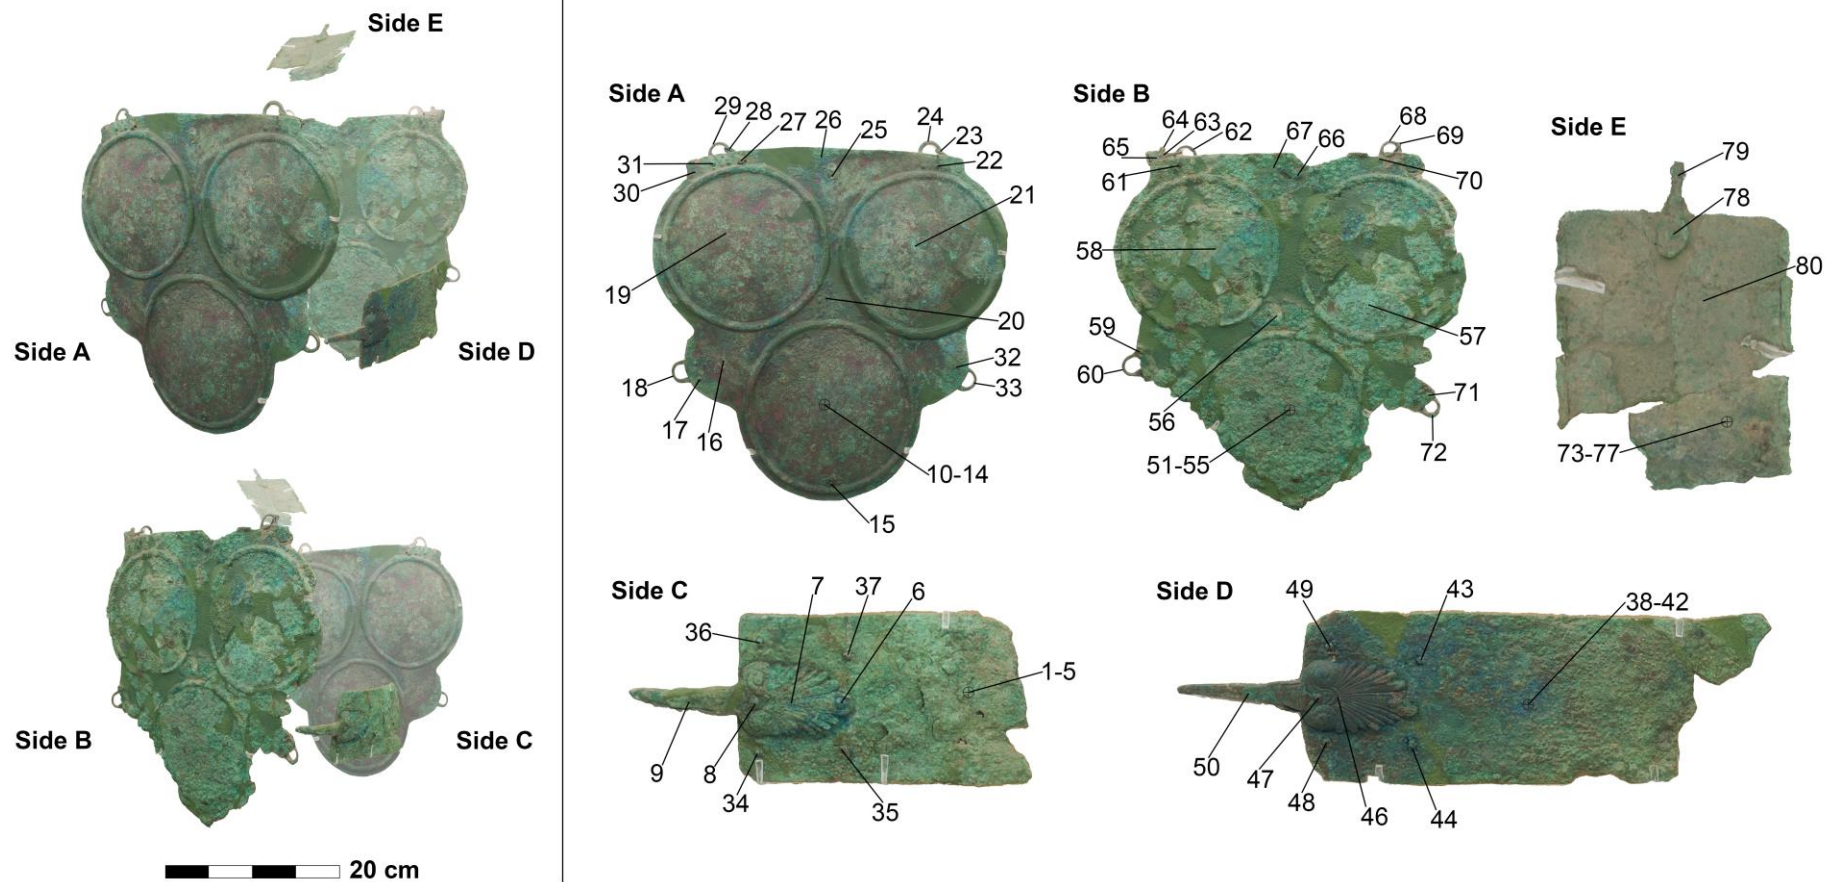

Figure S1.1: P001

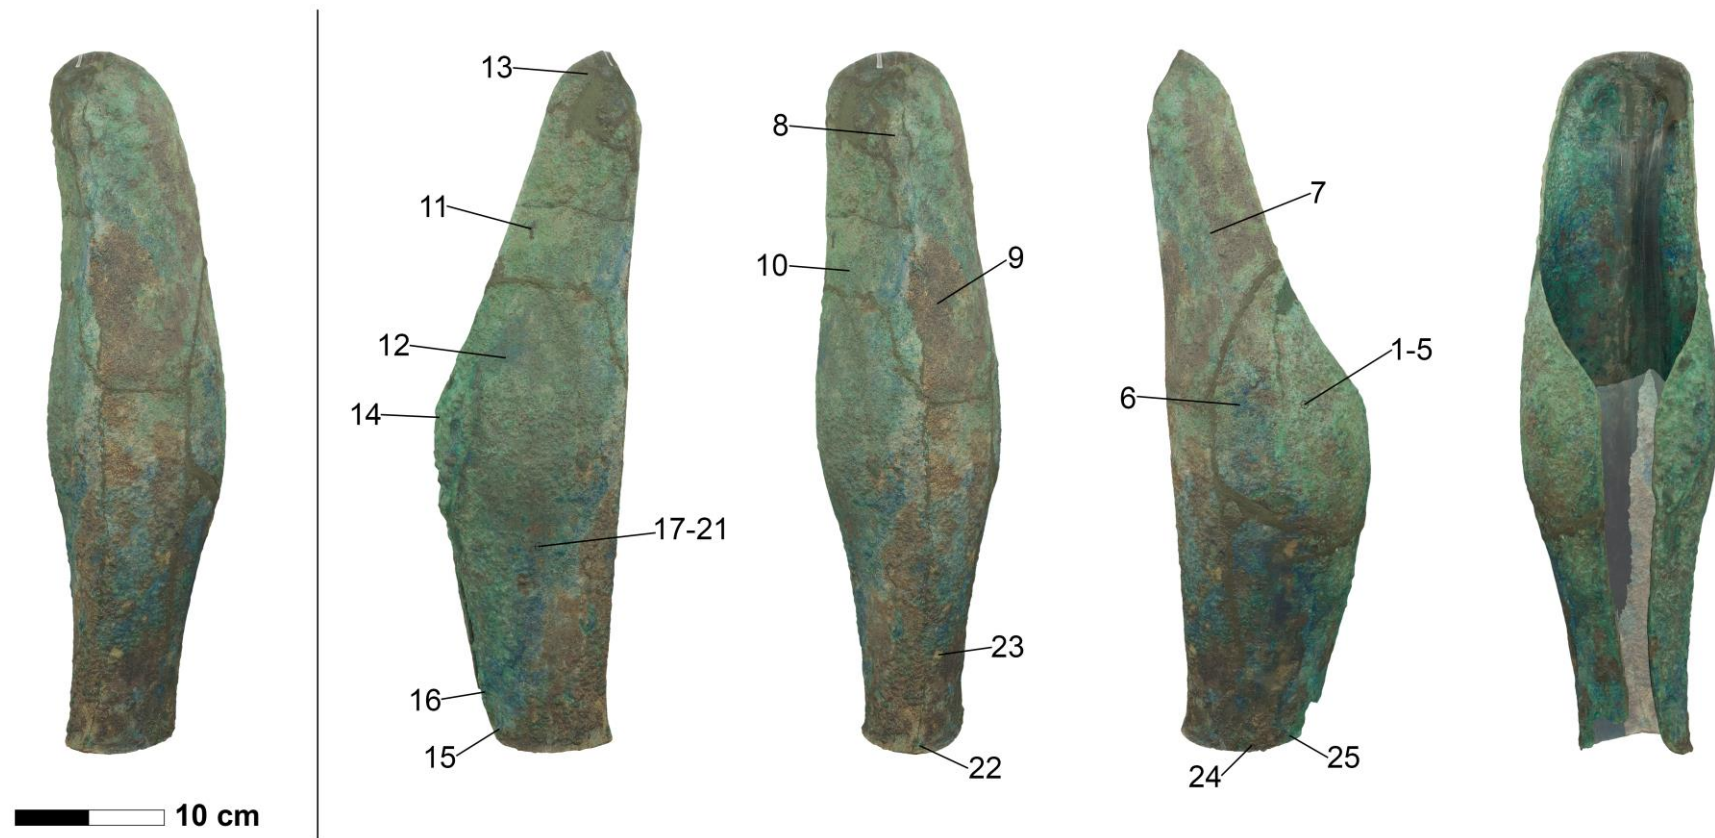

Figure S1.2: P002

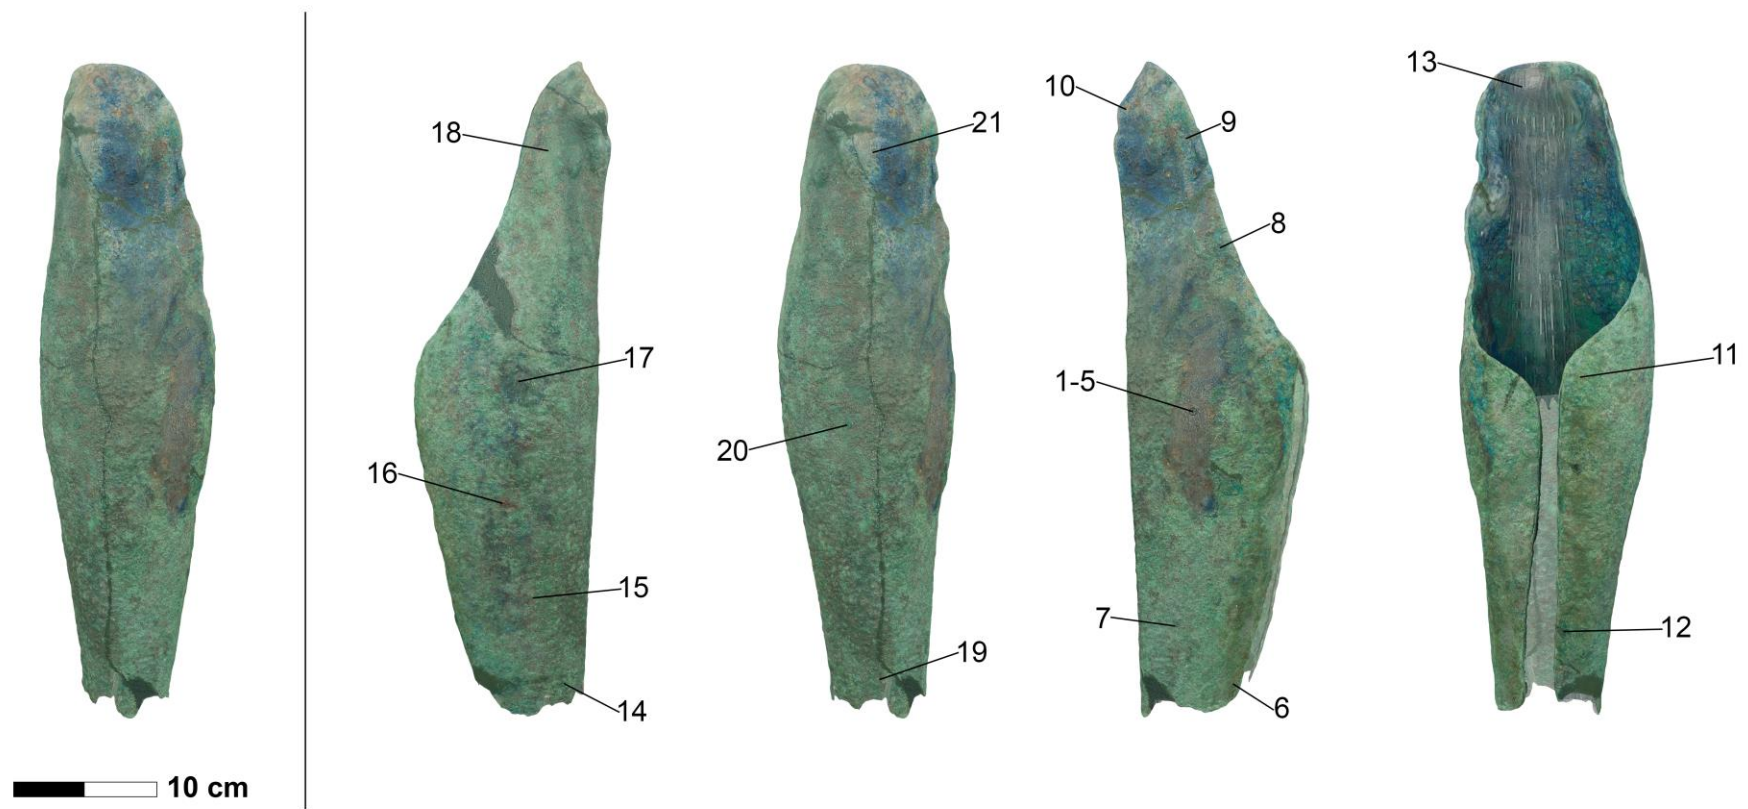

Figure S1.3: P003

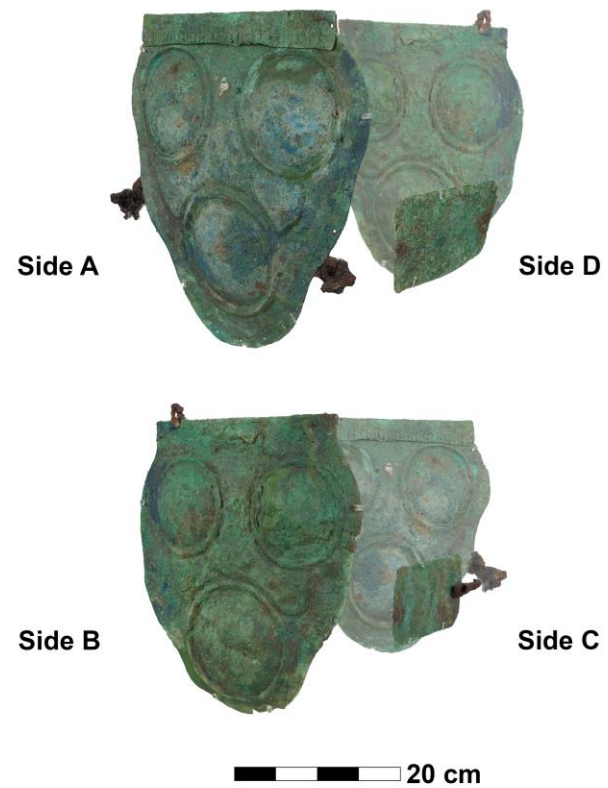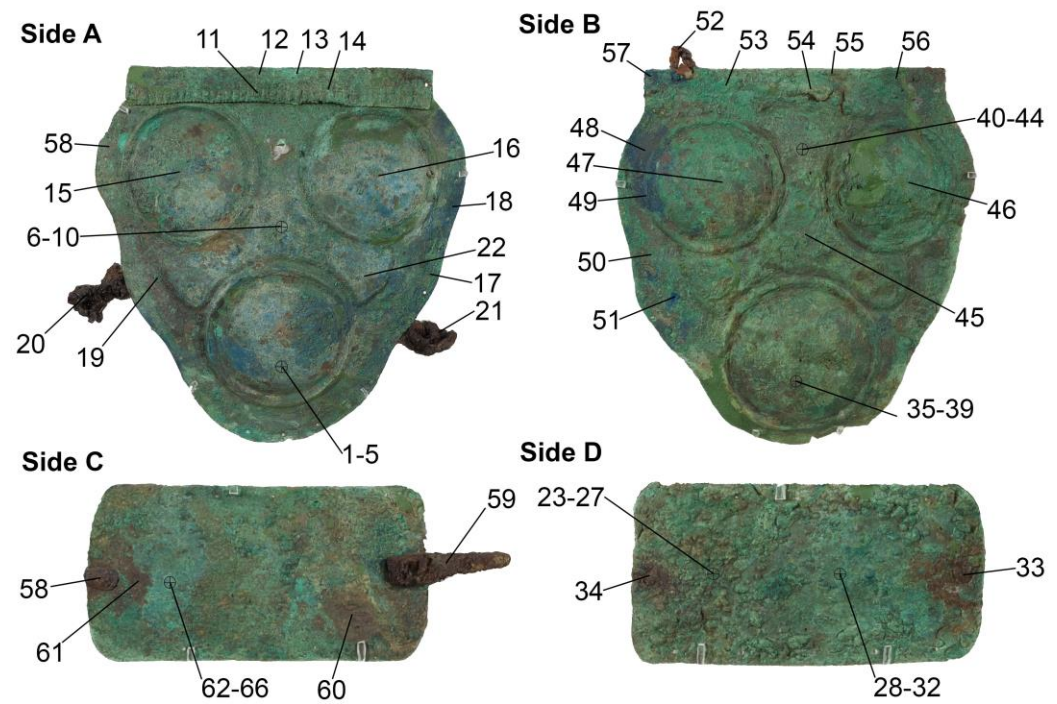

Figure S1.4: P004

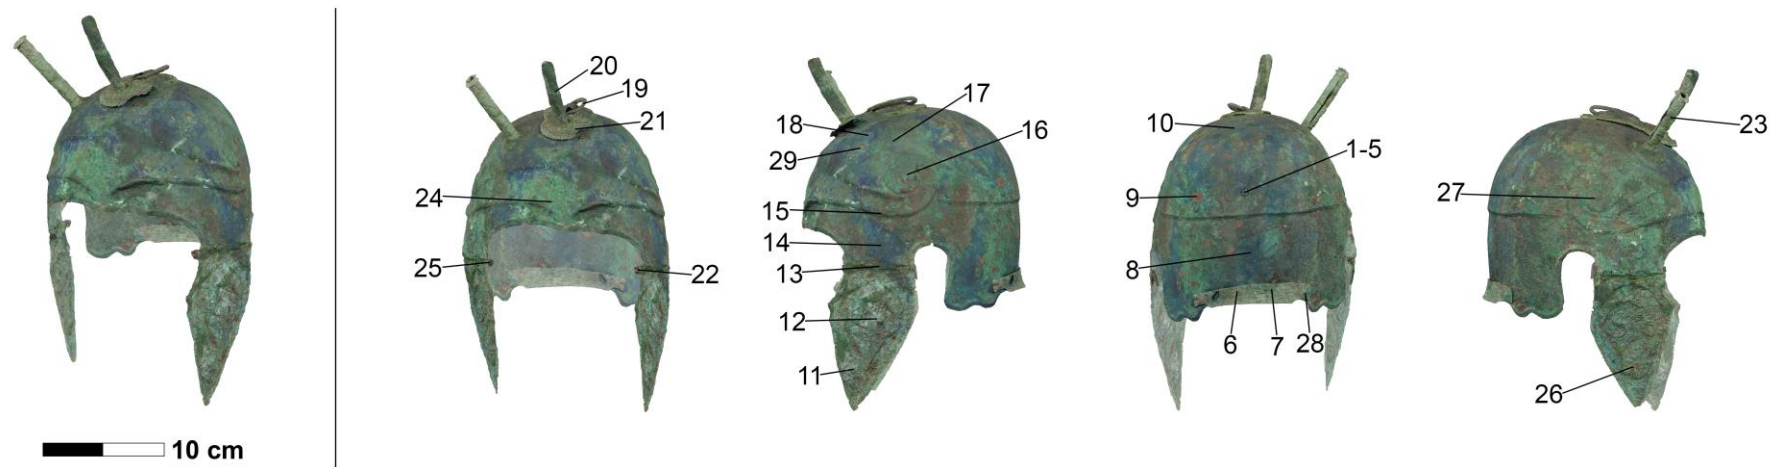

Figure S1.5: P005

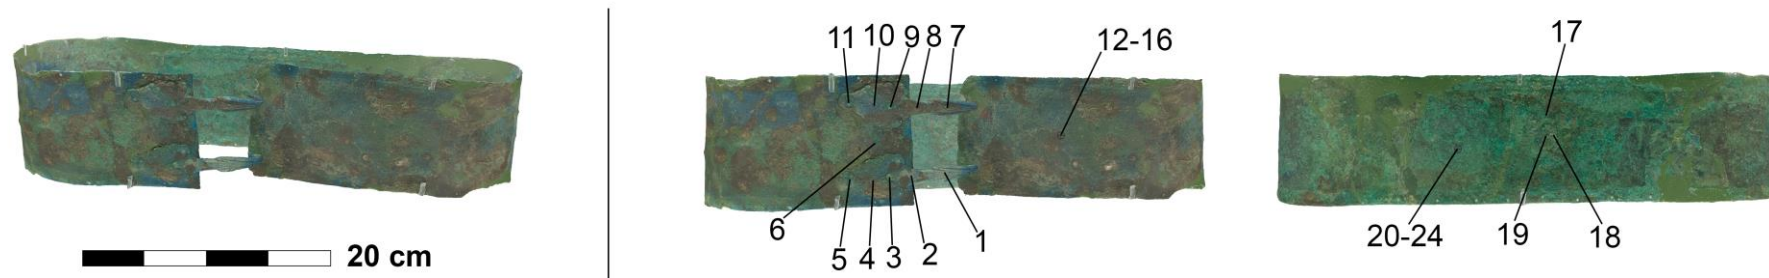

Figure S1.6: P006

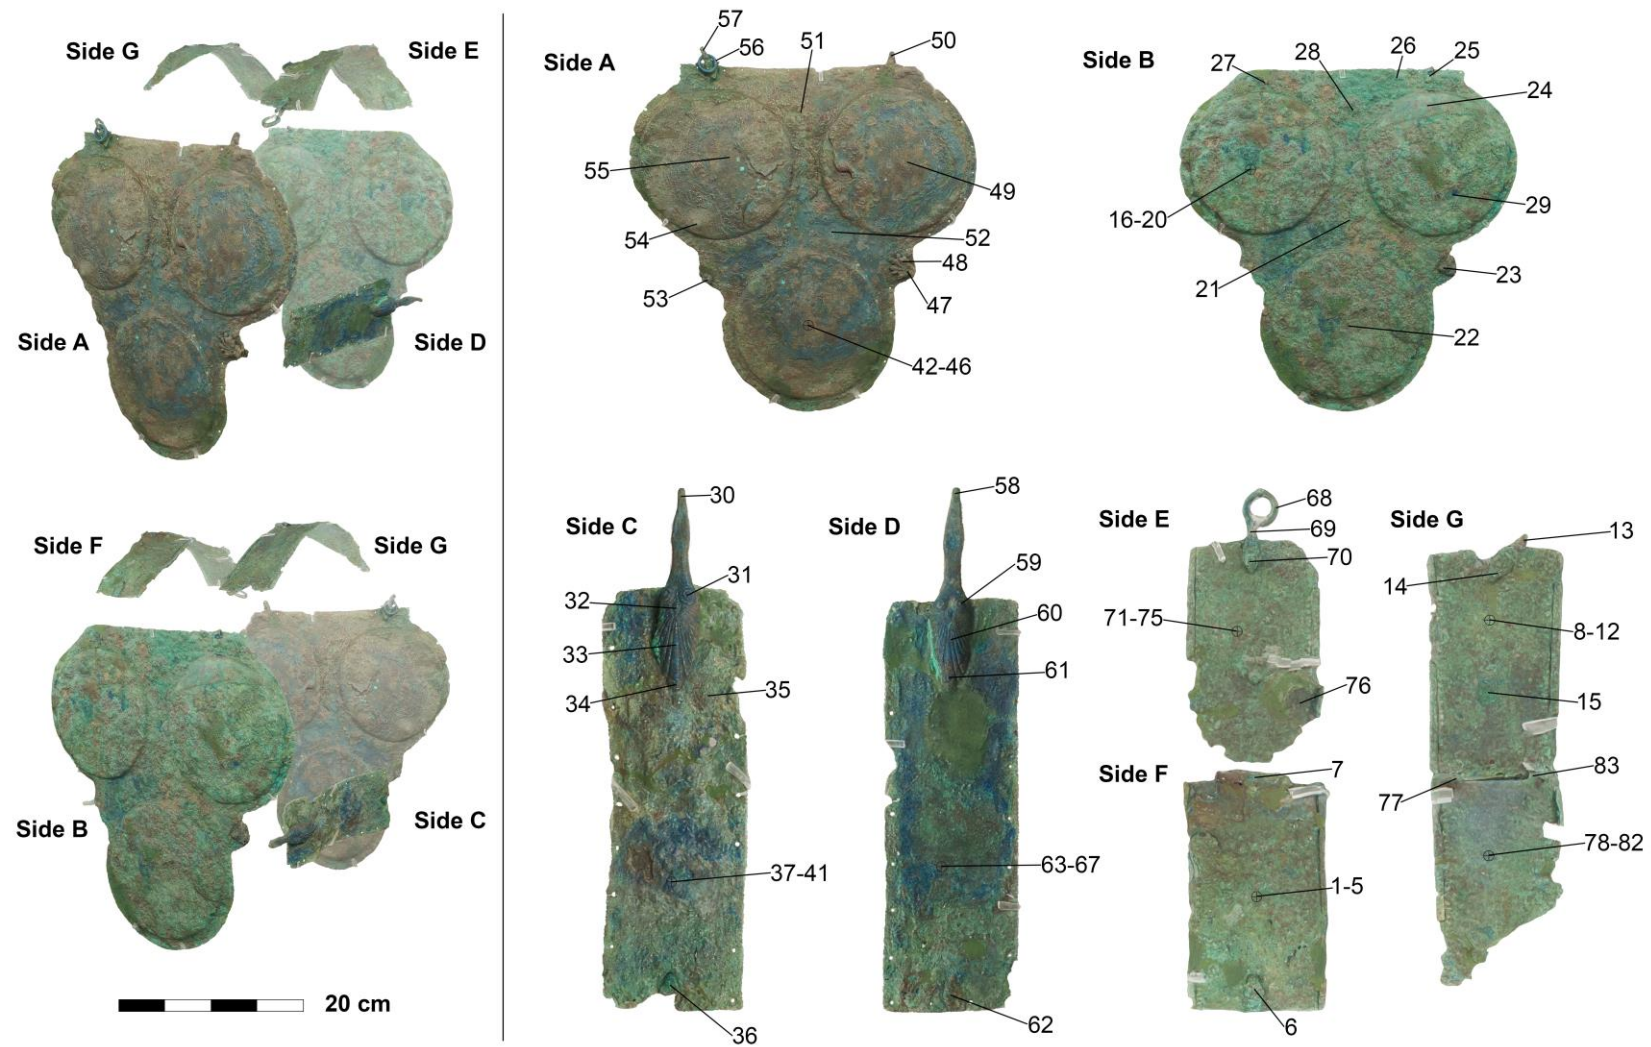

Figure S1.7: P008

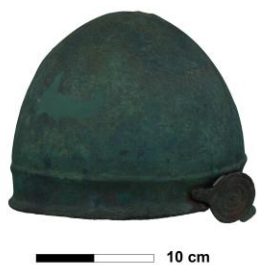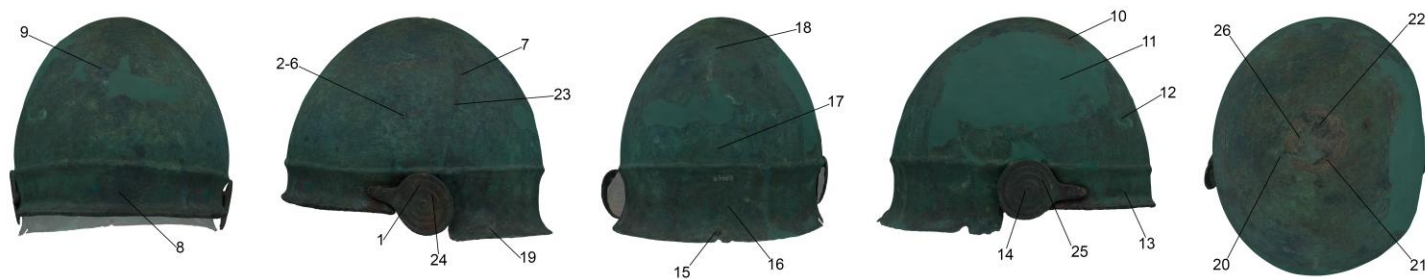

Figure S1.8: VG001

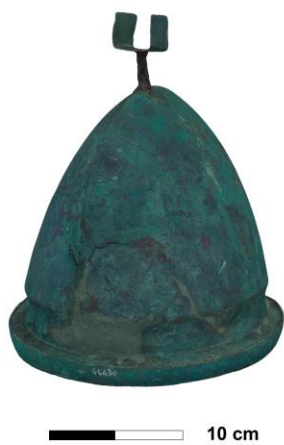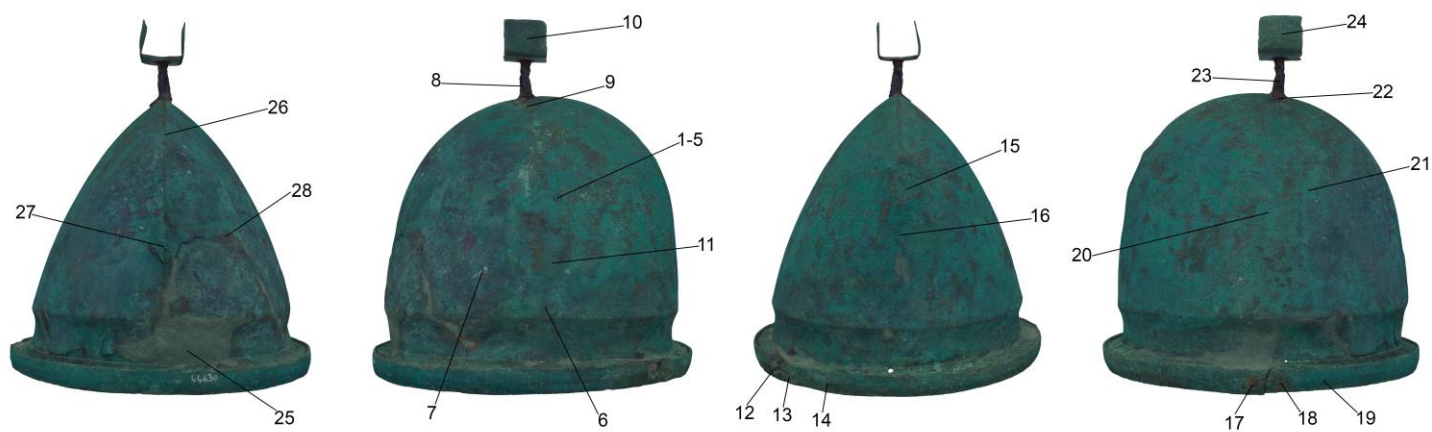

Figure S1.9: VG002

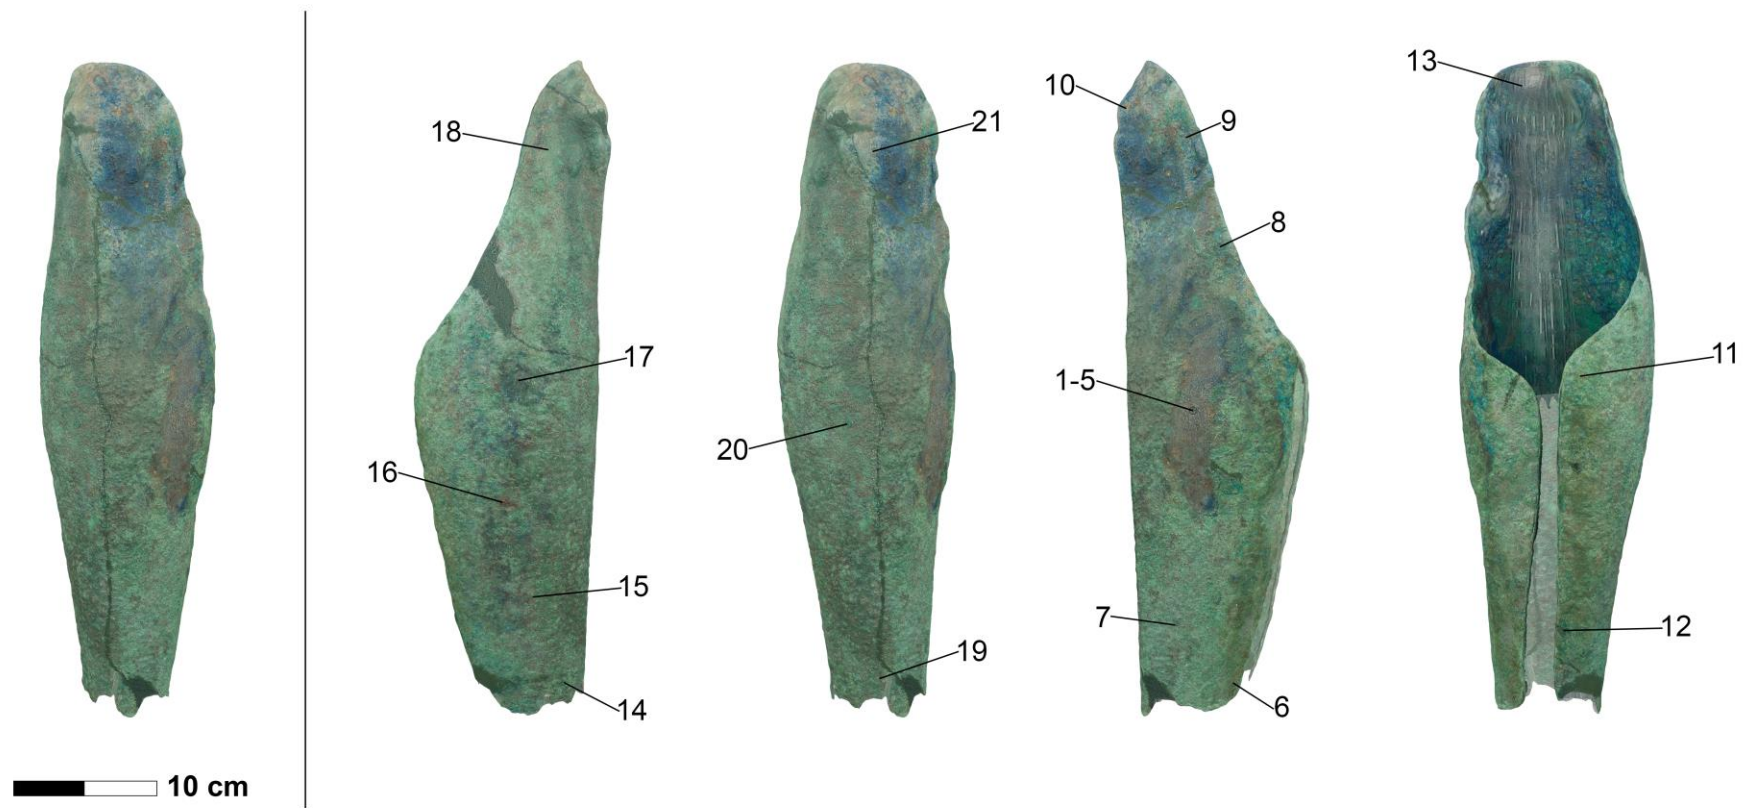

Figure S1.10: VG003

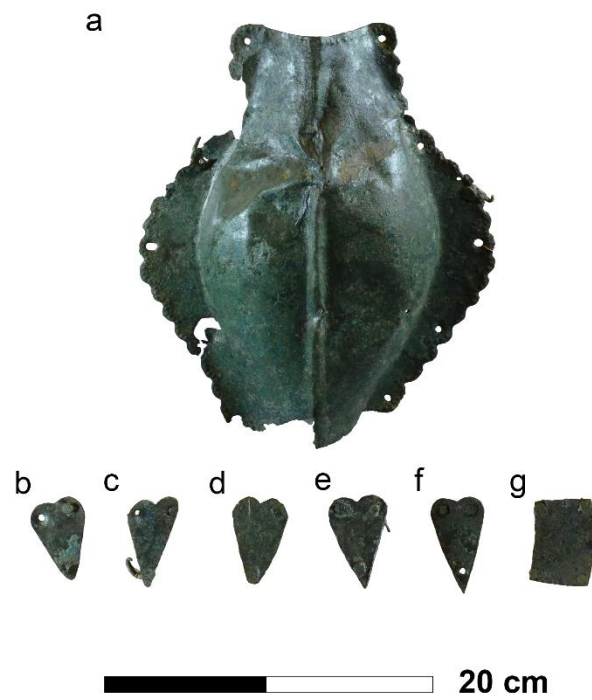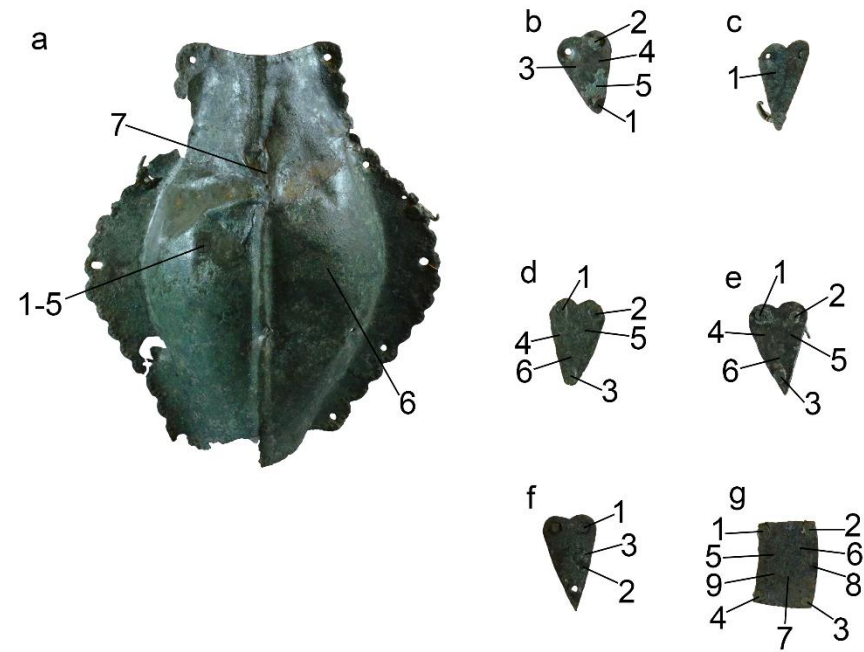

Figure S1.11: VG004a-g

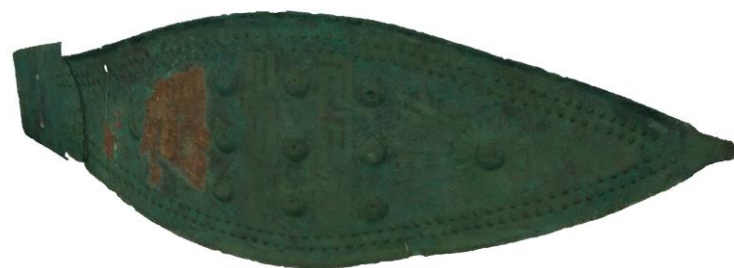

20 cm

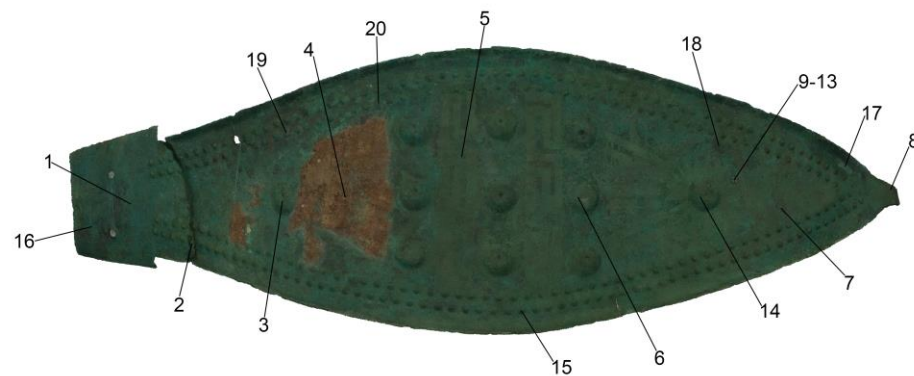

Figure S1.12: VG006

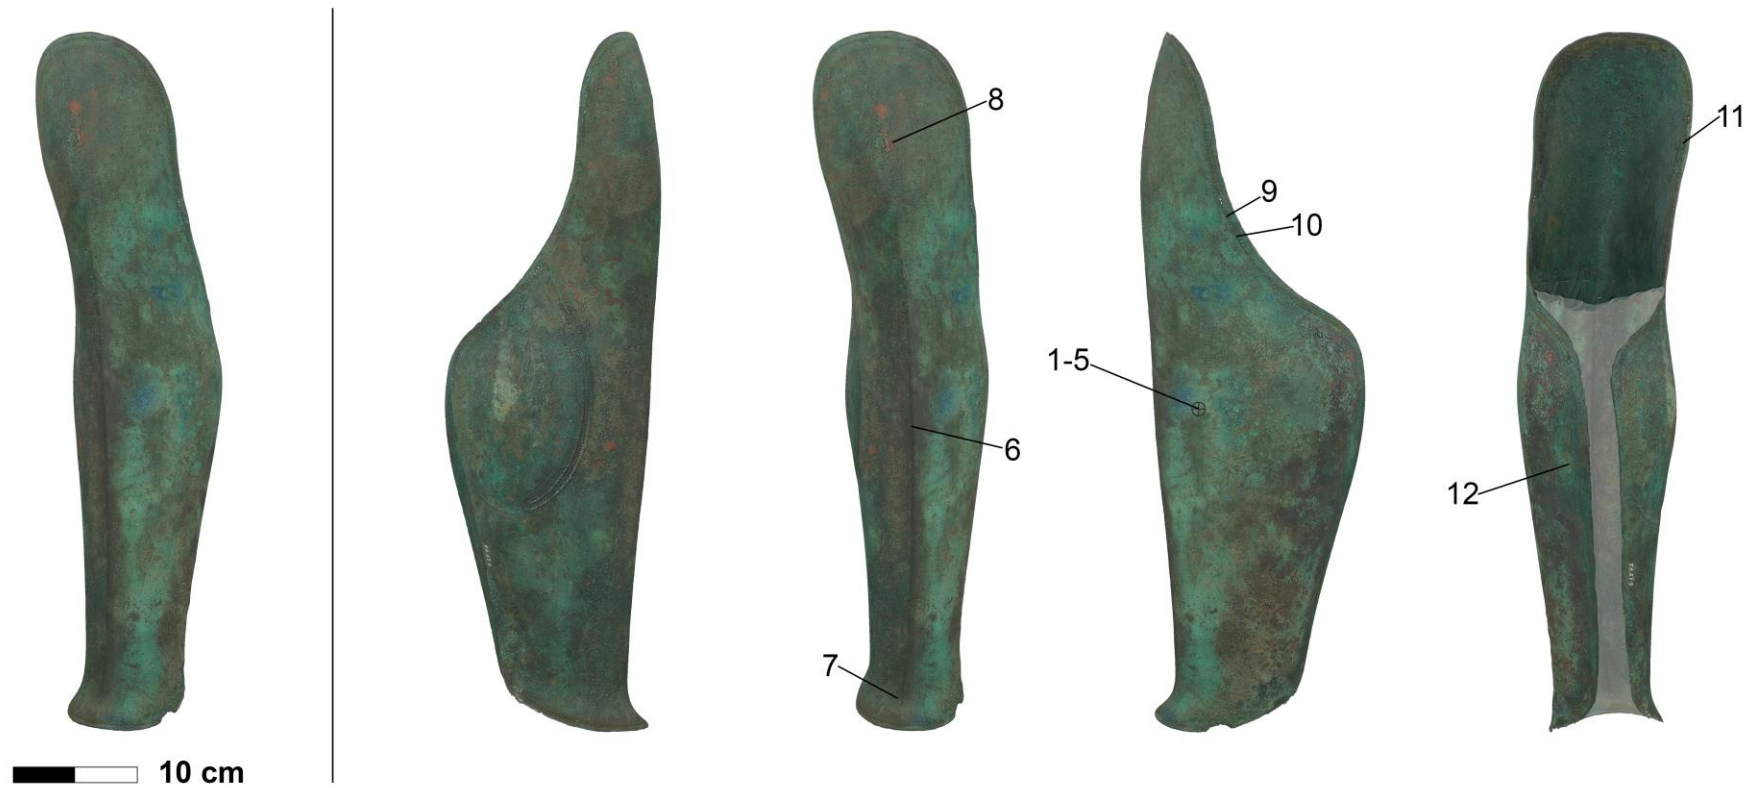

Figure S1.13: VG008

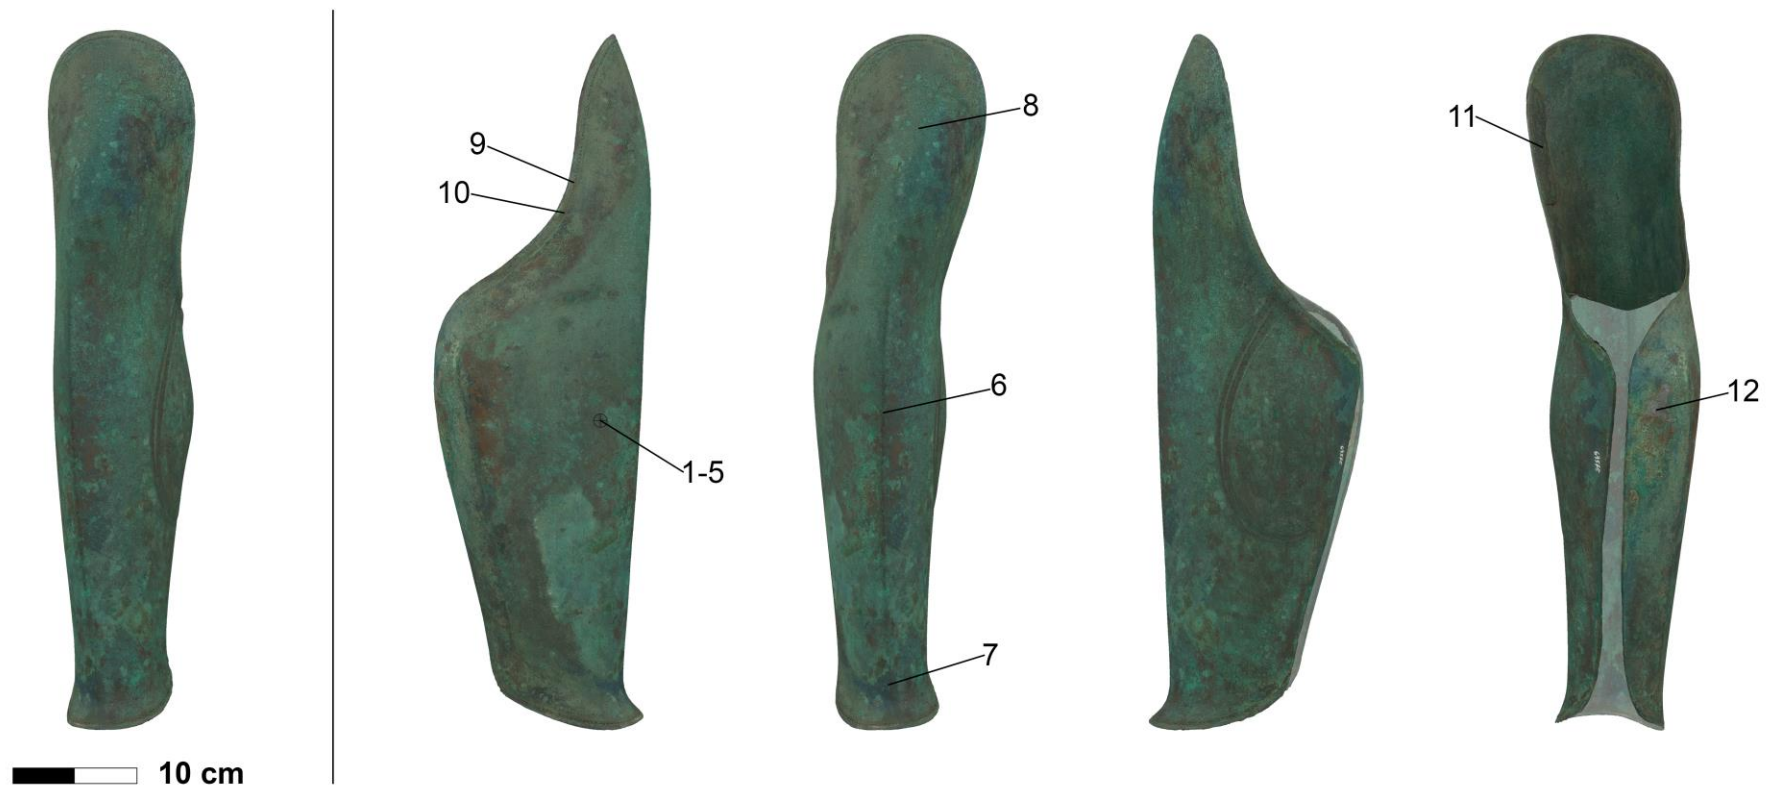

Figure S1.14: VG009

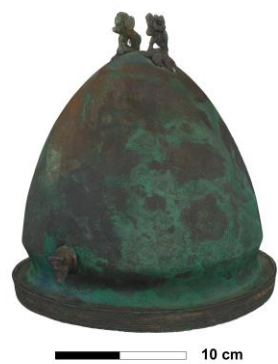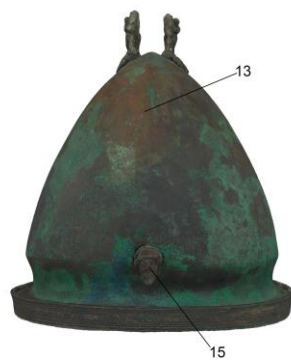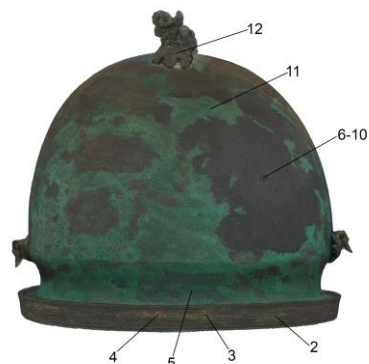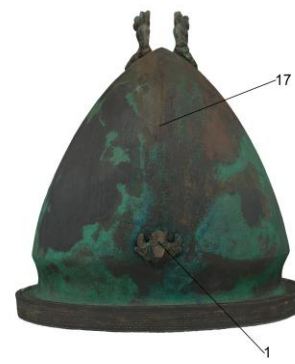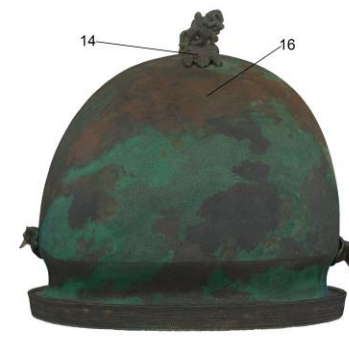

Figure S1.15: VG010

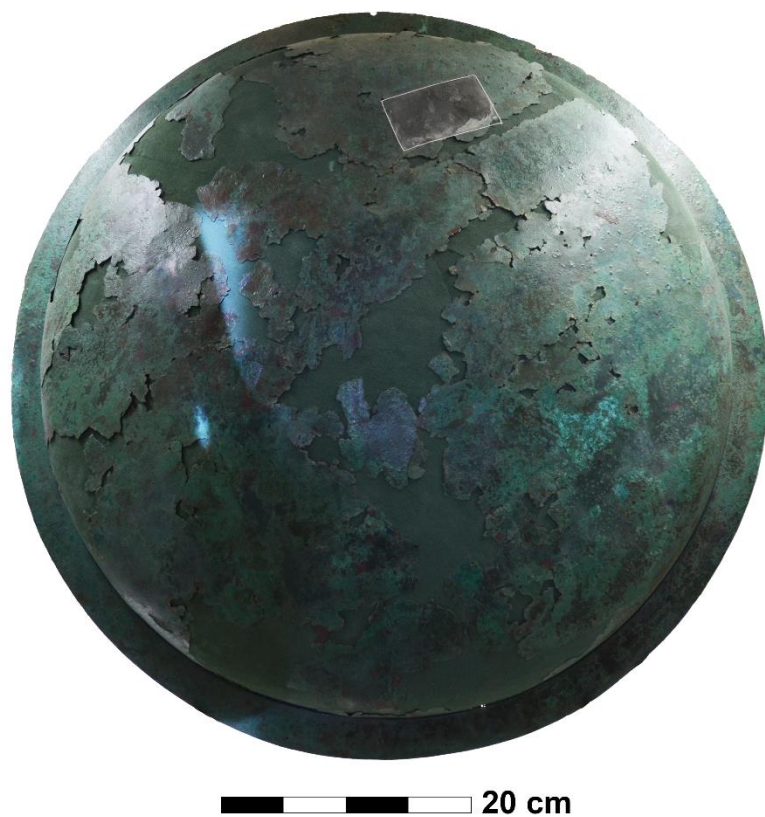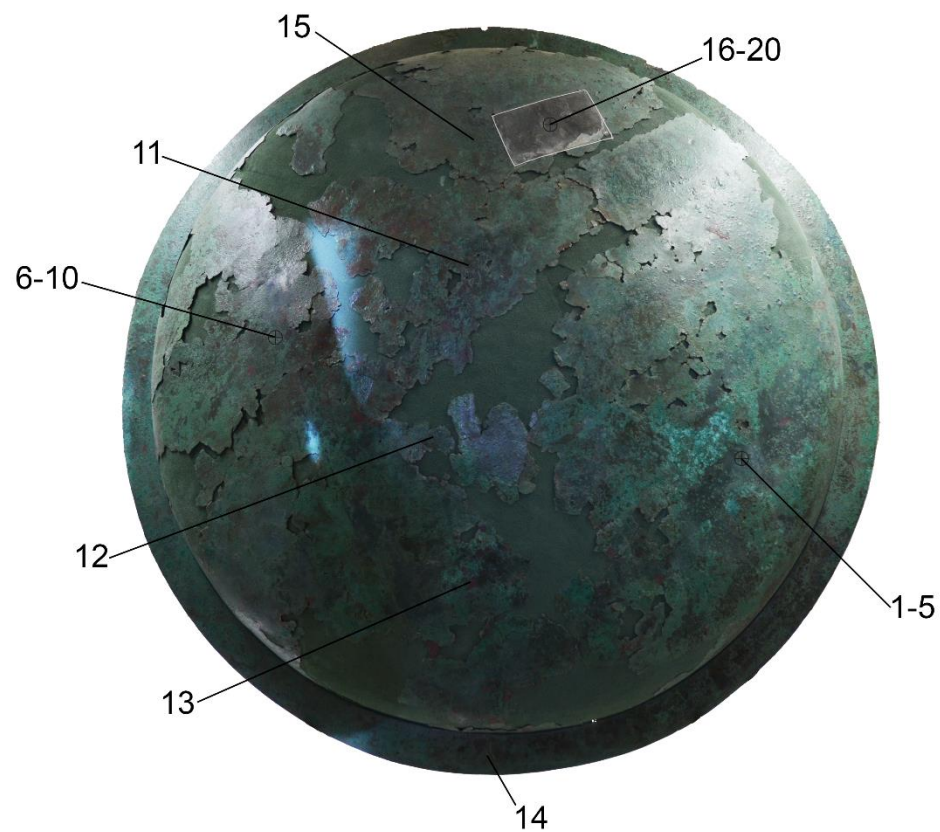

Figure S1.16: VG011

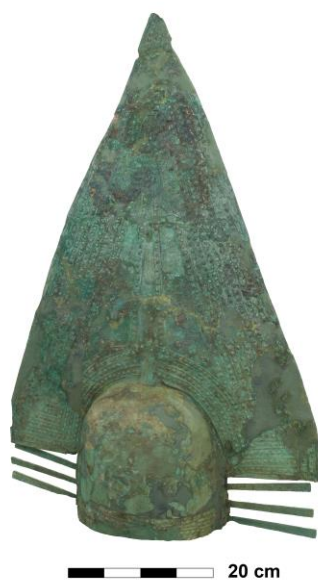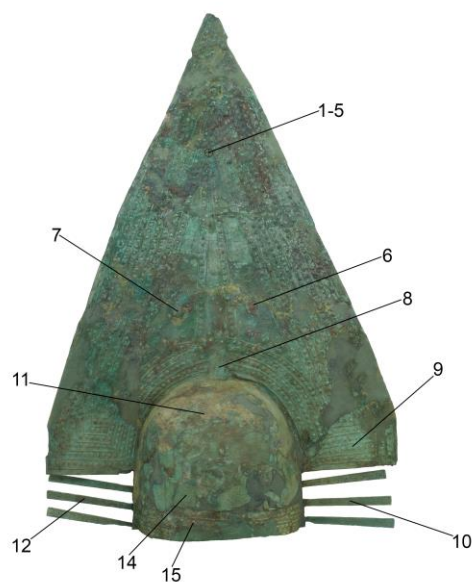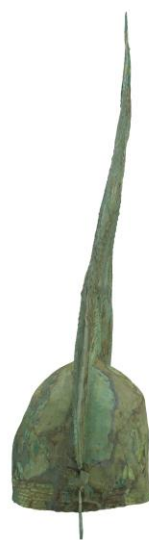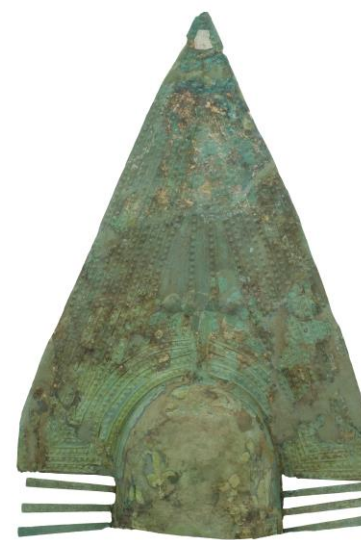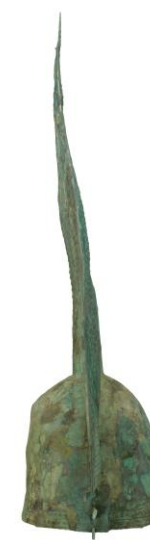

Figure S1.17: VG012

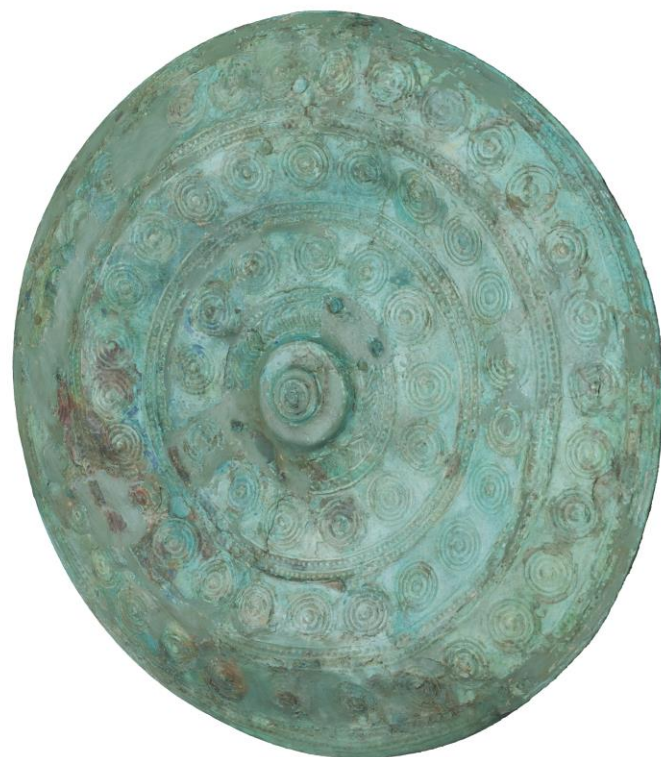

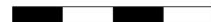 20 cm

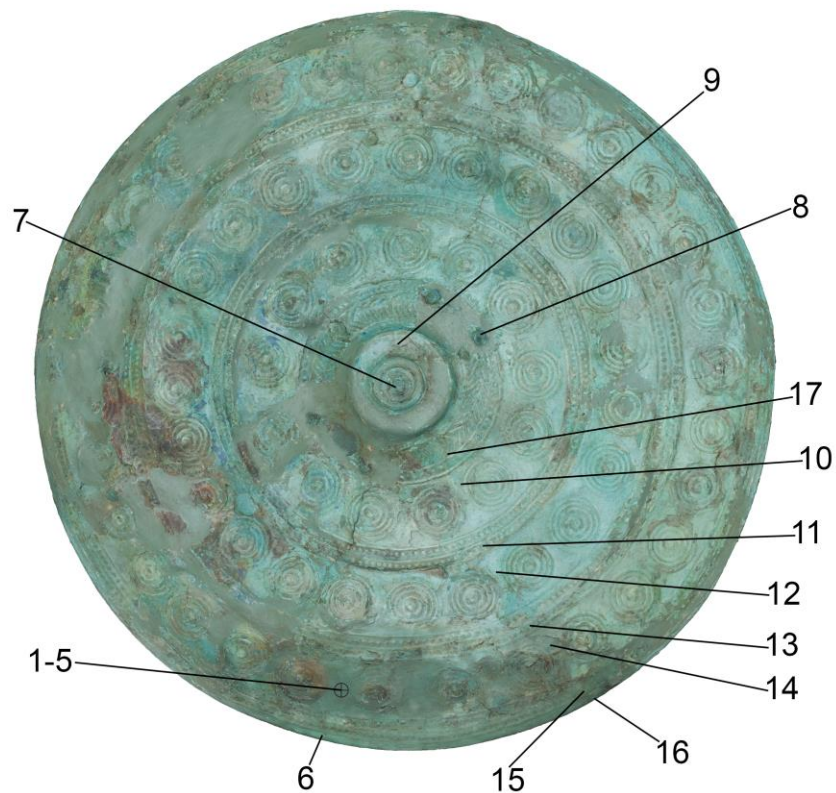

Figure S1.18: VG013

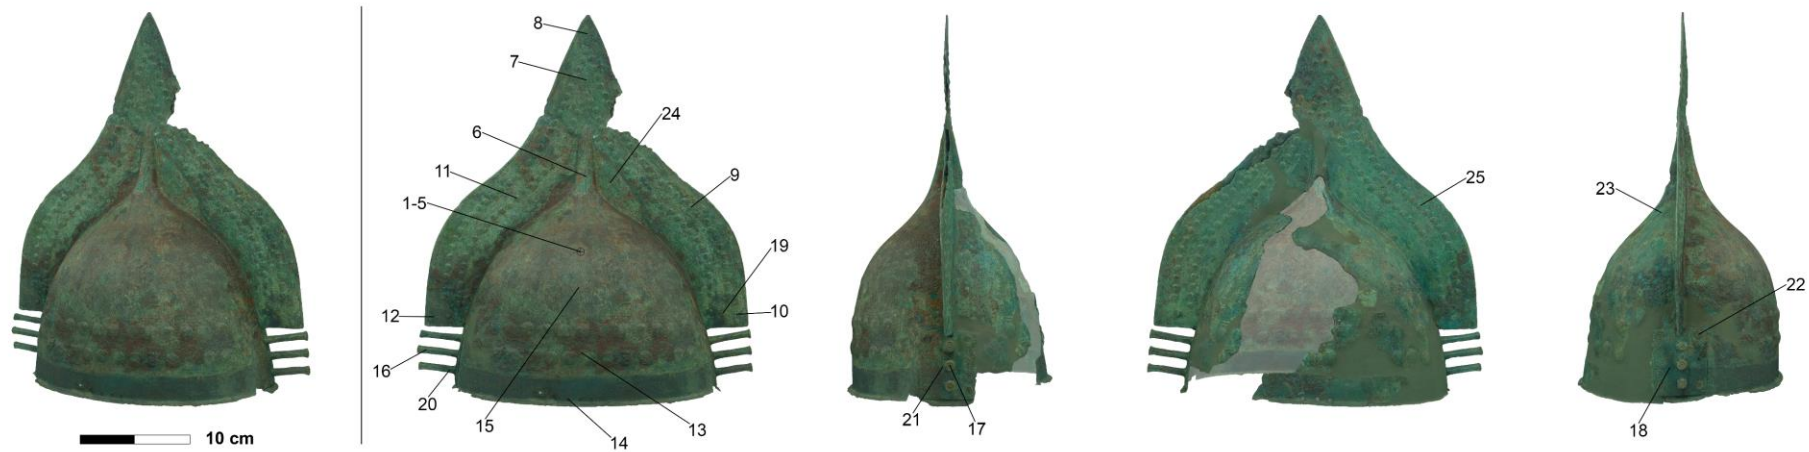

Figure S1.19: VG015

Front

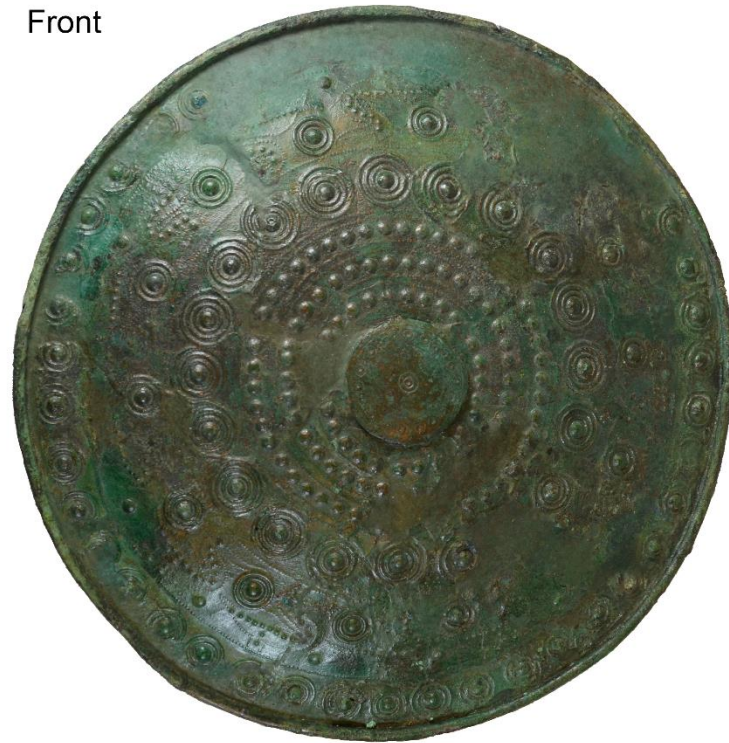

10 cm

Back

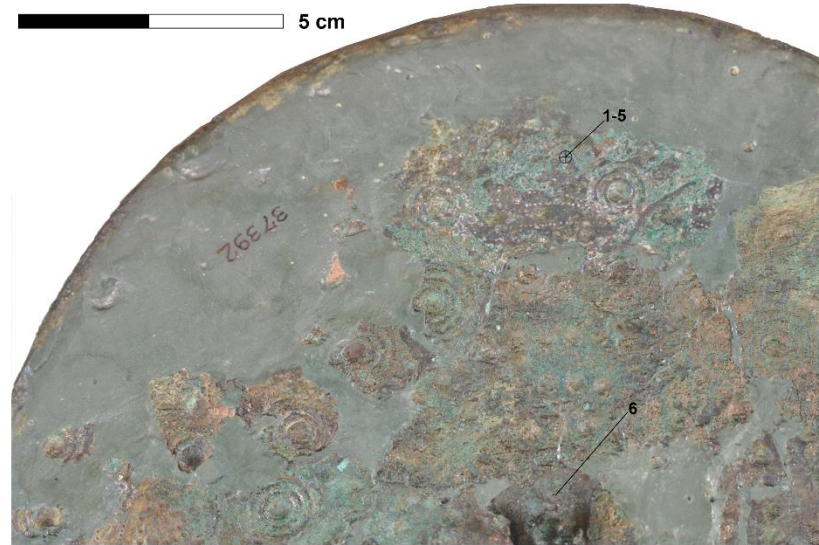

Figure S1.20: VG016

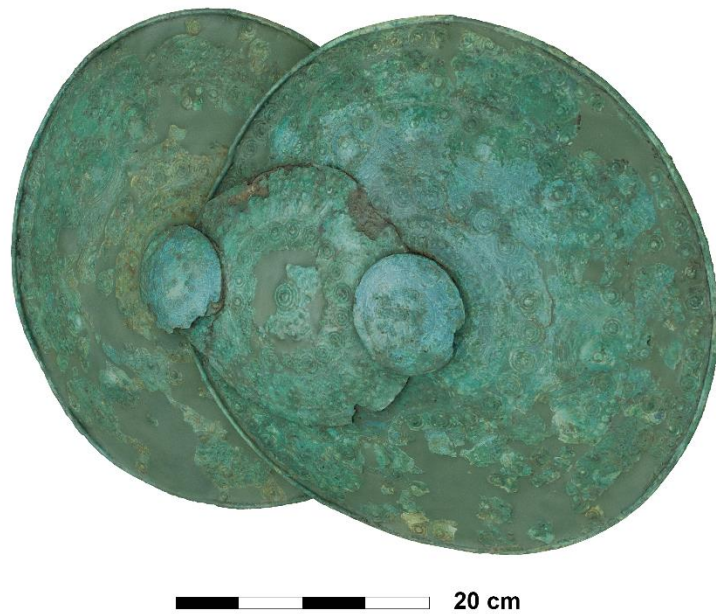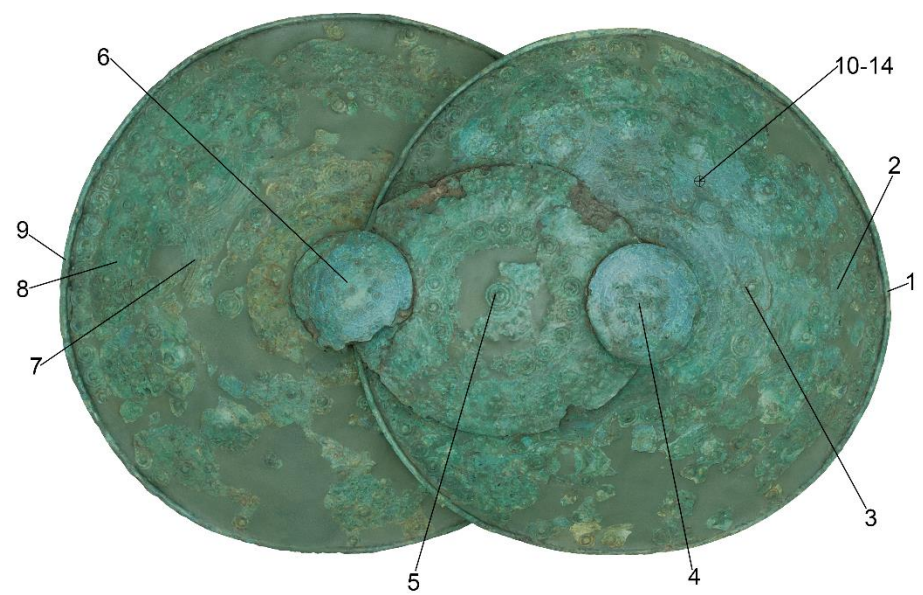

Figure S1.21: VG017

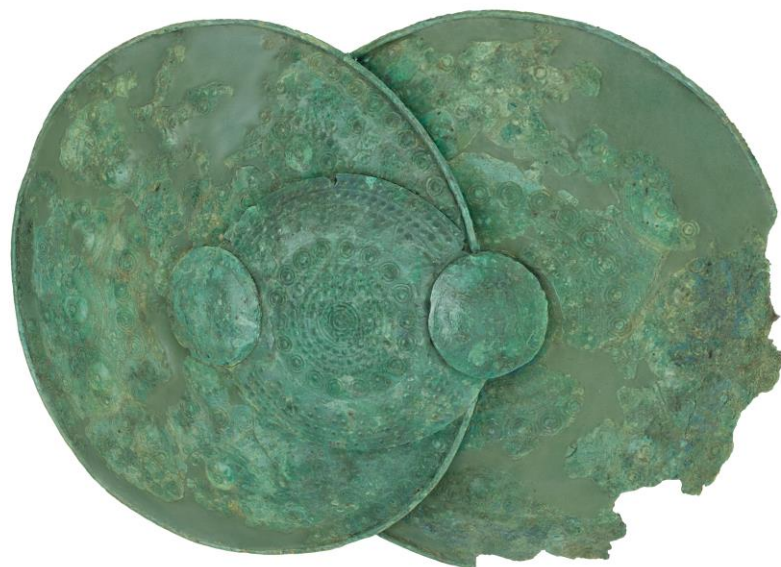

20 cm

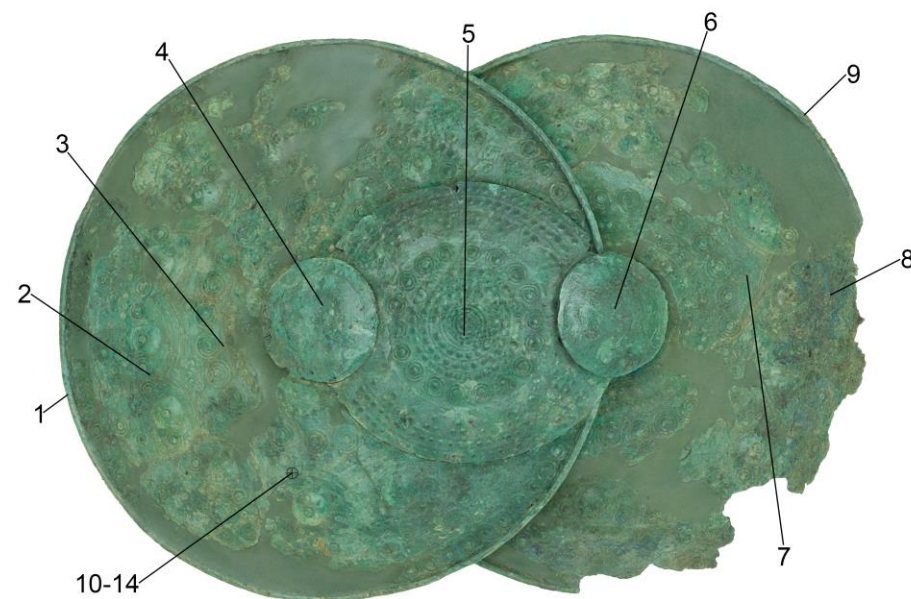

Figure S1.22: VG018

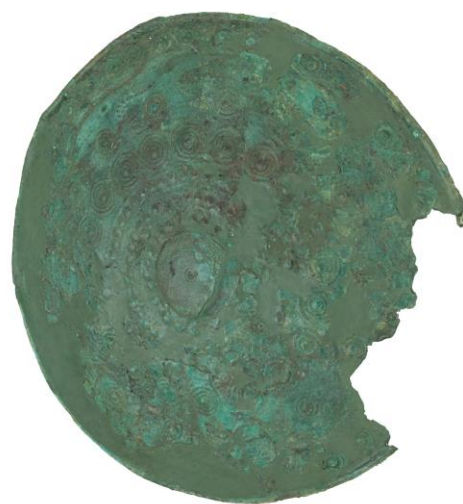

10 cm

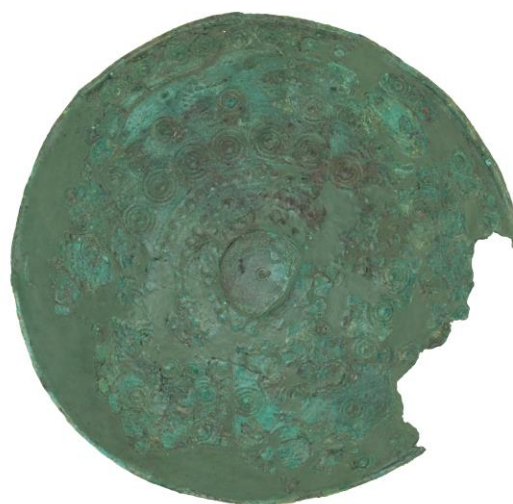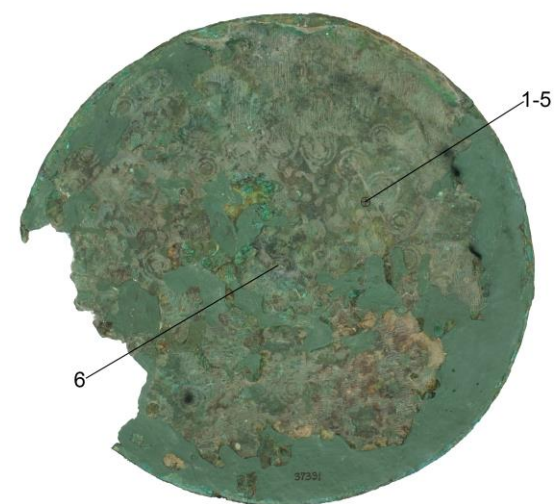

Figure S1.23: VG019
