# Supplementary material for: Pitfalls and Possibilities of Patinated Bronze: The Analysis of Pre-Roman Italian Armour Using pXRF
Source: MDPI journal article supplement (doi:10.3390/min11070697), 2021-06-29
Supplement: s1 [file s1 › S2_Data.csv]

Sample	Object	Assay	Cluster	NorthSouth	Century	Type	Modern	Mn	Fe	Ni	Cu	Zn	As	Sn	Sb	Pb
P001_1	P001	1	P001_3	South	5	Curiass		0.051	0.279	0.049	69.513	0.587	0.081	9.08	0.003	0.057
P001_10	P001	10	P001_1	South	5	Curiass		0.055	0.15	-0.053	89.761	0.016	0.098	6.118	0.007	0.025
P001_11	P001	11	P001_1	South	5	Curiass		0.06	0.148	-0.065	89.737	0.028	0.107	6.203	0.014	0.034
P001_12	P001	12	P001_1	South	5	Curiass		0.056	0.134	-0.064	91.879	-0.04	0.082	5.615	0.005	0.008
P001_13	P001	13	P001_1	South	5	Curiass		0.057	0.131	-0.075	91.679	-0.041	0.093	6.685	0.006	0.012
P001_14	P001	14	P001_1	South	5	Curiass		0.058	0.122	-0.051	89.901	0.013	0.082	6.478	0.014	0.017
P001_15	P001	15	na	South	5	Curiass		0.054	0.341	0.06	67.499	0.639	0.079	4.16	0.013	0.018
P001_16	P001	16	na	South	5	Curiass		0.064	0.253	-0.035	84.389	0.165	0.091	6.866	0.024	0.019
P001_17	P001	17	na	South	5	Curiass		0.049	0.26	0.013	75.172	0.424	0.095	6.035	0.016	0.052
P001_18	P001	18	na	South	5	Curiass		0.048	0.401	0.132	49.712	1.129	0.106	3.348	0.068	0.085
P001_19	P001	19	na	South	5	Curiass		0.064	0.152	-0.071	91.616	-0.039	0.101	7.391	0.02	0.023
P001_2	P001	2	P001_3	South	5	Curiass		0.053	0.288	0.049	69.767	0.582	0.101	9.352	0.014	0.064
P001_20	P001	20	na	South	5	Curiass		0.087	0.23	-0.014	80.256	0.276	0.101	5.138	0.019	0.031
P001_21	P001	21	na	South	5	Curiass		0.055	0.168	-0.037	87.063	0.089	0.097	7.029	0.025	0.019
P001_22	P001	22	na	South	5	Curiass		0.053	0.289	0.052	67.735	0.628	0.118	4.361	0.017	0.019
P001_23	P001	23	na	South	5	Curiass		0.054	0.407	0.09	58.441	0.893	0.112	3.931	0.02	0.085
P001_24	P001	24	na	South	5	Curiass		0.046	0.317	0.107	55.273	0.975	0.084	2.532	0.02	0.053
P001_25	P001	25	na	South	5	Curiass		0.055	0.393	0.123	54.11	1.011	0.071	5.489	-0.009	0.486
P001_26	P001	26	na	South	5	Curiass		0.057	0.238	0.026	74.148	0.448	0.113	4.402	0.02	0.226
P001_27	P001	27	na	South	5	Curiass		0.049	0.259	0.08	64.575	0.716	0.093	4.371	0.006	0.064
P001_28	P001	28	na	South	5	Curiass		0.047	0.304	0.127	53.358	1.029	0.093	2.717	0	0.068
P001_29	P001	29	na	South	5	Curiass		0.048	0.378	0.149	46.51	1.238	0.106	3.263	0.011	0.095
P001_3	P001	3	P001_3	South	5	Curiass		0.052	0.202	0.048	68.244	0.614	0.086	7.959	0.011	0.038
P001_30	P001	30	na	South	5	Curiass		0.05	0.215	0.064	66.026	0.673	0.1	4.316	0.004	0.03
P001_31	P001	31	na	South	5	Curiass		0.056	0.307	0.067	66.426	0.671	0.144	8.009	-0.003	0.132
P001_32	P001	32	na	South	5	Curiass		0.053	0.193	0.056	67.691	0.636	0.068	1.7	-0.01	0.021
P001_33	P001	33	na	South	5	Curiass		0.045	0.245	0.174	41.844	1.339	0.093	0.878	0.051	0.028
P001_34	P001	34	na	South	5	Curiass		0.069	0.266	0.177	47.912	1.537	0.116	2.461	0	0.034
P001_35	P001	35	na	South	5	Curiass		0.051	0.338	0.153	55.426	1.266	0.074	4.384	0.002	0.029
P001_36	P001	36	na	South	5	Curiass		0.054	0.186	0.122	64.05	1.39	0.077	2.457	0.002	0.03
P001_37	P001	37	na	South	5	Curiass		0.047	0.221	0.156	53.009	1.38	0.069	3.779	0.001	0.069
P001_38	P001	38	P001_5	South	5	Curiass		0.052	0.134	0.057	78.292	0.852	0.061	2.955	0.029	0.012
P001_39	P001	39	P001_5	South	5	Curiass		0.058	0.102	0.047	77.135	0.84	0.068	2.533	-0.001	0.004
P001_4	P001	4	P001_3	South	5	Curiass		0.051	0.197	0.051	67.612	0.64	0.081	5.385	0.006	0.013
P001_40	P001	40	P001_5	South	5	Curiass		0.053	0.116	0.036	79.986	0.763	0.07	3.496	0.008	0.021
P001_41	P001	41	P001_5	South	5	Curiass		0.05	0.1	0.038	77.339	0.754	0.067	3.723	-0.005	0.025
P001_42	P001	42	P001_5	South	5	Curiass		0.057	0.119	0.002	85.02	0.542	0.081	3.067	0.011	0.008
P001_43	P001	43	na	South	5	Curiass		0.055	0.186	0.075	68.287	0.826	0.072	3.936	-0.013	0.054
P001_44	P001	44	na	South	5	Curiass		0.049	0.135	0.069	67.611	0.823	0.063	6.711	0.005	0.732
P001_45	P001	45	na	South	5	Curiass		0.049	0.111	0.055	71.75	0.712	0.082	2.154	0.003	0.042
P001_46	P001	46	na	South	5	Curiass		0.054	0.08	0.039	77.369	0.569	0.074	5.729	0.013	0.019
P001_47	P001	47	na	South	5	Curiass		0.049	0.108	0.061	76.098	0.562	0.09	5.756	-0.002	0.069
P001_48	P001	48	na	South	5	Curiass		0.051	0.146	0.096	65.269	0.807	0.056	2.621	-0.001	0.002
P001_49	P001	49	na	South	5	Curiass		0.054	0.21	0.087	67.254	0.747	0.063	3.528	-0.014	0.028
P001_5	P001	5	P001_3	South	5	Curiass		0.049	0.254	0.07	65.094	0.706	0.08	7.588	0.005	0.041
P001_50	P001	50	na	South	5	Curiass		0.053	0.161	0.11	56.01	1.008	0.095	4.888	0.019	0.038
P001_51	P001	51	P001_4	South	5	Curiass		0.049	0.213	0.057	68.832	0.692	0.079	4.322	0.006	0.057
P001_52	P001	52	P001_4	South	5	Curiass		0.055	0.225	0.039	72.539	0.591	0.103	4.964	0.016	0.066
P001_53	P001	53	P001_4	South	5	Curiass		0.056	0.228	0.041	73.013	0.583	0.121	4.774	0.002	0.063
P001_54	P001	54	P001_4	South	5	Curiass		0.046	0.242	0.038	72.824	0.579	0.125	5.698	0.013	0.071
P001_55	P001	55	P001_4	South	5	Curiass		0.053	0.216	0.027	74.009	0.533	0.121	4.857	0.011	0.068
P001_56	P001	56	na	South	5	Curiass		0.051	0.242	0.074	63.276	0.802	0.094	5.046	0.009	0.053
P001_57	P001	57	na	South	5	Curiass		0.049	0.319	0.059	68.217	0.673	0.188	12.132	0.023	0.19
P001_58	P001	58	na	South	5	Curiass		0.502	0.601	0.13	49.964	1.138	0.157	10.366	0.021	0.151
P001_59	P001	59	na	South	5	Curiass		0.119	0.309	0.091	61.39	0.84	0.15	7.827	0.026	0.127
P001_6	P001	6	na	South	5	Curiass		0.053	0.183	0.059	68.606	0.607	0.077	5.696	-0.01	0.045
P001_60	P001	60	na	South	5	Curiass		0.046	0.386	0.158	45.23	1.262	0.124	3.447	0.012	0.153
P001_61	P001	61	na	South	5	Curiass		0.072	0.307	0.085	61.022	0.85	0.116	3.706	0.019	0.081
P001_62	P001	62	na	South	5	Curiass		0.046	0.289	0.192	39.466	1.414	0.076	1.858	0	0.057
P001_63	P001	63	na	South	5	Curiass		0.049	0.505	0.131	53.453	1.042	0.188	6.392	0.044	0.198
P001_64	P001	64	na	South	5	Curiass		0.046	0.268	0.128	49.732	1.133	0.08	4.76	0.022	0.041
P001_65	P001	65	na	South	5	Curiass		0.05	0.518	0.103	57.847	0.919	0.206	6.985	0.023	0.24
P001_66	P001	66	na	South	5	Curiass		0.065	0.341	0.158	45.319	1.254	0.104	15.874	0.006	1.782
P001_67	P001	67	na	South	5	Curiass		0.053	0.223	0.077	63.257	0.764	0.093	5.902	0	0.085
P001_68	P001	68	na	South	5	Curiass		0.046	0.459	0.173	43.903	1.294	0.122	4.937	0.008	0.273
P001_69	P001	69	na	South	5	Curiass		0.047	0.466	0.162	46.613	1.226	0.129	5.34	0.015	0.232
P001_7	P001	7	na	South	5	Curiass		0.05	0.169	0.045	71.839	0.519	0.097	9.476	-0.004	0.09
P001_70	P001	70	na	South	5	Curiass		0.339	0.444	0.073	61.733	0.808	0.15	3.263	0.027	0.038
P001_71	P001	71	na	South	5	Curiass		0.05	0.321	0.067	65.617	0.7	0.153	6.841	0.001	0.13
P001_72	P001	72	na	South	5	Curiass		0.045	0.419	0.174	43.302	1.313	0.128	4.268	0.004	0.222
P001_73	P001	73	P001_2	South	5	Curiass		0.052	0.348	0.021	73.746	0.469	0.062	6.974	0.012	-0.002
P001_74	P001	74	P001_2	South	5	Curiass		0.053	1.324	0.04	68.539	0.611	0.116	9.052	0.019	0.022
P001_75	P001	75	P001_2	South	5	Curiass		0.052	0.445	0.036	71.65	0.528	0.088	10.181	0.009	0.021
P001_76	P001	76	P001_2	South	5	Curiass		0.052	0.256	0.059	68.068	0.625	0.087	9.386	0	0.025
P001_77	P001	77	P001_2	South	5	Curiass		0.055	0.536	0.044	69.882	0.572	0.067	6.622	-0.005	0.004
P001_78	P001	78	na	South	5	Curiass		0.063	0.353	0.105	58.835	0.883	0.092	2.803	0.013	0.095
P001_79	P001	79	na	South	5	Curiass		0.052	0.363	0.142	51.032	1.097	0.108	2.801	-0.002	0.101
P001_8	P001	8	na	South	5	Curiass		0.05	0.196	0.075	65.133	0.712	0.067	3.354	0	0.033
P001_80	P001	80	na	South	5	Curiass		0.099	0.246	0.052	66.793	0.664	0.078	7.631	0.002	0.02
P001_9	P001	9	na	South	5	Curiass		0.052	0.26	0.065	66.455	0.671	0.072	6.602	0.021	0.044
P002_1	P002	1	P002_2	South	4	Greave		0.057	0.091	0.117	73.538	1.588	0.083	2.552	0.001	-0.017
P002_10	P002	10	na	South	4	Greave		0.063	0.114	0.054	78.921	0.776	0.128	2.368	0.008	-0.017
P002_11	P002	11	na	South	4	Greave		0.299	0.812	0.083	65.533	0.938	0.14	6.394	0.015	-0.006
P002_12	P002	12	na	South	4	Greave		0.067	0.265	0.048	80.028	0.646	0.134	2.872	0.008	-0.017
P002_13	P002	13	na	South	4	Greave		0.094	0.514	0.044	72.406	0.796	0.094	4.076	0.003	-0.013
P002_14	P002	14	na	South	4	Greave		0.052	0.212	0.06	68.642	0.804	0.117	4.208	0.018	-0.002
P002_15	P002	15	na	South	4	Greave		0.053	0.192	0.051	79.346	0.556	0.081	2.734	0.009	-0.022
P002_16	P002	16	na	South	4	Greave		0.063	0.183	0.083	73.024	0.679	0.144	9.141	0.026	-0.01
P002_17	P002	17	P002_1	South	4	Greave		0.055	0.223	0.021	77.471	0.56	0.359	8.173	-0.008	-0.003
P002_18	P002	18	P002_1	South	4	Greave		0.061	0.222	0.023	80.503	0.469	0.334	8.907	0.02	-0.018
P002_19	P002	19	P002_1	South	4	Greave		0.055	0.222	0.044	72.257	0.65	0.283	7.257	0.005	-0.014
P002_2	P002	2	P002_2	South	4	Greave		0.06	0.087	0.106	77.553	1.53	0.096	2.747	0.002	-0.014
P002_20	P002	20	P002_1	South	4	Greave		0.053	0.197	0.04	73.852	0.614	0.289	7.914	0.006	-0.008
P002_21	P002	21	P002_1	South	4	Greave		0.051	0.234	0.042	72.603	0.618	0.34	7.767	0.028	-0.001
P002_22	P002	22	na	South	4	Greave		0.054	0.264	0.1	58.727	0.98	0.164	9.496	-0.004	-0.004
P002_23	P002	23	na	South	4	Greave		0.056	0.184	0.083	76.803	0.504	0.158	7.762	0.008	-0.011
P002_24	P002	24	na	South	4	Greave		0.054	0.148	0.085	77.26	0.483	0.089	1.942	0	-0.007
P002_25	P002	25	na	South	4	Greave		0.051	0.177	0.067	71.684	0.606	0.169	11.17	0.006	0.006
P002_3	P002	3	P002_2	South	4	Greave		0.072	0.103	0.089	78.898	1.45	0.107	3.371	-0.003	-0.016
P002_4	P002	4	P002_2	South	4	Greave		0.053	0.123	0.095	72.874	1.373	0.124	3.961	0.008	-0.007
P002_5	P002	5	P002_2	South	4	Greave		0.071	0.104	0.055	80.116	1.093	0.095	4.362	0.004	-0.011
P002_6	P002	6	na	South	4	Greave		0.057	0.117	0.069	77.137	1.106	0.12	3.291	-0.012	-0.009
P002_7	P002	7	na	South	4	Greave		0.058	0.085	0.026	83.691	0.755	0.077	1.864	0.013	-0.017
P002_8	P002	8	na	South	4	Greave		0.181	0.762	0.061	68.587	0.908	0.431	14.312	0.009	0.317
P002_9	P002	9	na	South	4	Greave		0.056	0.098	0.057	81.961	0.777	0.12	4.286	0.001	-0.012
P003_1	P003	1	P003_1	South	4	Greave		0.051	0.213	-0.003	81.067	0.306	0.197	9.291	0.005	0.006
P003_10	P003	10	na	South	4	Greave		0.067	0.277	0.045	78.503	0.37	0.138	5.381	0.006	-0.012
P003_11	P003	11	na	South	4	Greave		0.054	0.166	0.055	74.096	0.474	0.065	7.637	0	-0.004
P003_12	P003	12	na	South	4	Greave		0.047	0.194	0.133	55.327	0.979	0.052	3.943	0.001	-0.021
P003_13	P003	13	na	South	4	Greave		0.049	0.264	0.091	57.777	0.909	0.045	1.453	-0.002	-0.021
P003_14	P003	14	na	South	4	Greave		0.055	0.144	0.023	81.498	0.255	0.065	6.272	-0.002	-0.013
P003_15	P003	15	na	South	4	Greave		0.052	0.136	0.028	78.06	0.348	0.071	4.127	-0.002	-0.012
P003_16	P003	16	na	South	4	Greave		0.054	0.186	0.055	77.712	0.363	0.059	4.207	0.003	-0.013
P003_17	P003	17	na	South	4	Greave		0.057	0.151	-0.05	89.378	0.051	0.082	4.326	0.043	-0.015
P003_18	P003	18	na	South	4	Greave		0.056	0.369	0.042	71.475	0.533	0.06	5.291	0.007	-0.016
P003_19	P003	19	na	South	4	Greave		0.052	0.155	-0.004	82.577	0.226	0.067	5.635	0.006	-0.009
P003_2	P003	2	P003_1	South	4	Greave		0.051	0.166	0.004	79.978	0.35	0.153	6.175	0.013	0.015
P003_20	P003	20	na	South	4	Greave		0.053	0.188	0.079	64.119	0.728	0.052	5.209	-0.008	-0.026
P003_21	P003	21	na	South	4	Greave		0.054	0.31	0.134	56.501	0.954	0.112	3.48	0	-0.009
P003_3	P003	3	P003_1	South	4	Greave		0.057	0.175	-0.012	81.672	0.29	0.182	8.258	0.009	-0.002
P003_4	P003	4	P003_1	South	4	Greave		0.053	0.142	-0.011	82.456	0.266	0.183	6.78	-0.008	0.001
P003_5	P003	5	P003_1	South	4	Greave		0.055	0.196	0.009	78.223	0.379	0.192	7.118	0.017	-0.009
P003_6	P003	6	na	South	4	Greave		0.053	0.219	0.099	60.772	0.836	0.044	4.809	-0.004	-0.017
P003_7	P003	7	na	South	4	Greave		0.051	0.153	0.057	69.687	0.589	0.067	4.154	0.006	-0.025
P003_8	P003	8	na	South	4	Greave		0.063	0.166	-0.004	81.401	0.293	0.061	5.468	0.01	-0.01
P003_9	P003	9	na	South	4	Greave		0.051	0.114	0.028	75.433	0.431	0.055	8.481	0.001	-0.019
P004_1	P004	1	P004_1	South	4	Curiass		0.057	0.205	0.121	71.457	1.115	0.145	4.502	0.006	0.013
P004_10	P004	10	P004_6	South	4	Curiass		0.052	0.241	0.064	82.901	0.381	0.091	2.644	0.023	0.014
P004_11	P004	11	na	South	4	Curiass		0.053	0.152	0.035	73.741	0.561	0.087	4.496	0.01	0.04
P004_12	P004	12	na	South	4	Curiass		0.057	0.149	0.008	78.414	0.393	0.105	8.211	0.031	0.06
P004_13	P004	13	na	South	4	Curiass		0.05	0.128	0.027	74.665	0.467	0.098	11.302	0.018	0.061
P004_14	P004	14	na	South	4	Curiass		0.053	0.137	0.014	79.602	0.327	0.082	5.371	0.017	0.04
P004_15	P004	15	na	South	4	Curiass		0.054	0.19	-0.018	87.683	0.072	0.109	9.708	0.025	0.041
P004_16	P004	16	na	South	4	Curiass		0.05	0.24	0.004	78.575	0.321	0.099	5.268	0.017	0.015
P004_17	P004	17	na	South	4	Curiass		0.052	0.175	0.029	77.207	0.505	0.066	2.849	0.014	0.025
P004_18	P004	18	na	South	4	Curiass		0.064	0.246	0.1	68.069	0.697	0.067	4.062	0.001	0.014
P004_19	P004	19	na	South	4	Curiass		0.047	0.115	0.005	79.675	0.382	0.049	4.952	0.007	0.006
P004_2	P004	2	P004_1	South	4	Curiass		0.053	0.202	0.112	68.394	1.095	0.12	3.648	0.019	0.005
P004_20	P004	20	na	South	4	Curiass		0.114	23.488	0.201	36.452	1.494	0.042	-0.131	0.022	-0.01
P004_21	P004	21	na	South	4	Curiass		0.355	9.156	0.202	36.426	1.502	0.074	-0.131	0.02	0.005
P004_22	P004	22	na	South	4	Curiass		0.052	0.233	0.151	67.598	0.704	0.105	5.952	0.023	0.048
P004_23	P004	23	P004_4	South	4	Curiass		0.049	0.517	0.088	59.934	0.868	0.166	13.62	0.011	1.628
P004_24	P004	24	P004_4	South	4	Curiass		0.053	1.677	0.064	62.534	0.781	0.122	10.534	0.022	1.074
P004_25	P004	25	P004_4	South	4	Curiass		0.047	0.305	0.124	52.733	1.064	0.23	15.267	0.038	1.785
P004_26	P004	26	P004_4	South	4	Curiass		0.047	0.334	0.152	47.695	1.197	0.163	10.827	0.001	1.599
P004_27	P004	27	P004_4	South	4	Curiass		0.05	0.279	0.13	52.876	1.056	0.217	12.73	0.006	1.604
P004_28	P004	28	P004_5	South	4	Curiass		0.05	0.294	0.117	52.482	1.066	0.235	14.781	0.023	2.044
P004_29	P004	29	P004_5	South	4	Curiass		0.049	0.309	0.158	45.465	1.266	0.255	15.404	0.012	2.361
P004_3	P004	3	P004_1	South	4	Curiass		0.053	0.213	0.144	62.546	1.139	0.123	3.592	-0.013	0.008
P004_30	P004	30	P004_5	South	4	Curiass		0.05	0.241	0.105	55.111	0.985	0.162	10.598	0.003	1.282
P004_31	P004	31	P004_5	South	4	Curiass		0.051	0.324	0.124	53.355	1.074	0.357	18.179	0.035	2.99
P004_32	P004	32	P004_5	South	4	Curiass		0.048	0.248	0.089	58.576	0.892	0.186	11.425	0.021	1.448
P004_33	P004	33	na	South	4	Curiass		0.064	10.512	0.137	45.603	1.243	0.113	5.077	-0.005	0.469
P004_34	P004	34	na	South	4	Curiass		0.072	13.216	0.09	55.608	0.978	0.099	1.501	0.013	0.292
P004_35	P004	35	P004_2	South	4	Curiass		0.055	0.063	0.063	79.533	0.981	0.099	4.343	0.019	0.011
P004_36	P004	36	P004_2	South	4	Curiass		0.049	0.107	0.101	67.123	1.058	0.084	2.959	0.034	-0.001
P004_37	P004	37	P004_2	South	4	Curiass		0.053	0.139	0.096	65.152	1.056	0.091	7.335	0.023	0.054
P004_38	P004	38	P004_2	South	4	Curiass		0.056	0.122	0.072	69.997	0.94	0.088	8.108	0.03	0.052
P004_39	P004	39	P004_2	South	4	Curiass		0.051	0.135	0.084	67.191	0.927	0.096	8.773	0.035	0.059
P004_4	P004	4	P004_1	South	4	Curiass		0.066	0.179	0.102	72.221	0.945	0.143	4.373	0.023	0.013
P004_40	P004	40	P004_3	South	4	Curiass		0.051	0.011	-0.001	86.87	0.498	0.065	5.477	0.028	0.001
P004_41	P004	41	P004_3	South	4	Curiass		0.059	0.015	-0.004	86.581	0.457	0.067	5.52	0.031	0.008
P004_42	P004	42	P004_3	South	4	Curiass		0.053	0.021	-0.021	88.197	0.387	0.062	5.696	0.012	0.005
P004_43	P004	43	P004_3	South	4	Curiass		0.058	0.008	-0.021	88.027	0.337	0.092	5.804	0.04	0.001
P004_44	P004	44	P004_3	South	4	Curiass		0.053	0.019	-0.03	87.097	0.316	0.066	5.983	0.022	0.011
P004_45	P004	45	na	South	4	Curiass		0.057	0.08	0.007	83.926	0.351	0.06	3.729	0.006	-0.008
P004_46	P004	46	na	South	4	Curiass		0.054	0.088	0.03	77.489	0.47	0.073	4.097	0.026	0.021
P004_47	P004	47	na	South	4	Curiass		0.059	0.048	-0.035	89.54	0.133	0.074	7.163	0.04	0.034
P004_48	P004	48	na	South	4	Curiass		0.051	0.207	0.066	74.481	0.495	0.068	3.522	-0.001	-0.014
P004_49	P004	49	na	South	4	Curiass		0.052	0.135	0.038	79.581	0.311	0.066	5.168	0.009	-0.003
P004_5	P004	5	P004_1	South	4	Curiass		0.051	0.227	0.129	59.307	1.111	0.085	3.542	0.034	-0.003
P004_50	P004	50	na	South	4	Curiass		0.057	0.123	0.048	72.516	0.492	0.074	5.814	0.004	-0.007
P004_51	P004	51	na	South	4	Curiass		0.051	0.066	-0.001	87.702	0.272	0.088	4.769	0.019	0.006
P004_52	P004	52	na	South	4	Curiass		0.113	21.31	0.201	36.35	1.497	0.053	-0.118	0.007	0.005
P004_53	P004	53	na	South	4	Curiass		0.054	0.112	0.001	83.298	0.318	0.056	0.954	0.009	-0.013
P004_54	P004	54	na	South	4	Curiass		0.05	0.222	0.102	61.66	0.842	0.059	3.733	0.025	0.01
P004_55	P004	55	na	South	4	Curiass		0.051	0.133	0.063	70.888	0.586	0.063	4.086	0.009	0.013
P004_56	P004	56	na	South	4	Curiass		0.055	0.165	0.031	73.79	0.499	0.061	0.312	0.002	-0.001
P004_57	P004	57	na	South	4	Curiass		0.049	1.642	0.062	62.043	0.795	0.063	1.976	0.003	0.001
P004_58	P004	58	na	South	4	Curiass		0.09	18.223	0.141	45.3	1.254	0.102	3.575	0.012	0.293
P004_59	P004	59	na	South	4	Curiass		0.064	6.546	0.203	36.211	1.505	0.044	-0.126	-0.005	-0.021
P004_6	P004	6	P004_6	South	4	Curiass		0.06	0.351	0.113	71.391	0.785	0.096	2.071	0.009	0.004
P004_60	P004	60	na	South	4	Curiass		0.051	0.291	0.137	51.116	1.123	0.093	2.986	-0.001	0.085
P004_61	P004	61	na	South	4	Curiass		0.057	3.717	0.061	64.542	0.764	0.216	12.602	0.019	1.573
P004_62	P004	62	P004_7	South	4	Curiass		0.049	0.364	0.133	52.563	1.158	0.402	20.987	0.038	4.098
P004_63	P004	63	P004_7	South	4	Curiass		0.047	0.383	0.147	51.18	1.177	0.417	21.432	0.019	3.934
P004_64	P004	64	P004_7	South	4	Curiass		0.045	0.37	0.135	52.096	1.157	0.385	21.847	0.035	4.193
P004_65	P004	65	P004_7	South	4	Curiass		0.049	0.357	0.127	53.594	1.101	0.414	20.457	-0.001	3.591
P004_66	P004	66	P004_7	South	4	Curiass		0.047	0.364	0.13	53.66	1.103	0.399	20.583	0.027	3.905
P004_67	P004	67	na	South	4	Curiass		0.055	0.157	0.004	77.469	0.373	0.136	11.205	0.039	0.05
P004_68	P004	68	na	South	4	Curiass		0.056	0.155	0.012	78.844	0.317	0.101	7.325	0.027	0.015
P004_7	P004	7	P004_6	South	4	Curiass		0.052	0.258	0.046	86.488	0.461	0.073	1.419	0.012	-0.006
P004_8	P004	8	P004_6	South	4	Curiass		0.049	0.254	0.071	82.722	0.497	0.107	1.68	0.007	0.004
P004_9	P004	9	P004_6	South	4	Curiass		0.052	0.277	0.072	76.318	0.616	0.1	3.751	0.035	0
P005_1	P005	1	P005_1	South	4	Helmet		0.051	0.248	-0.034	89.739	0.037	0.15	5.978	0.027	0.914
P005_10	P005	10	na	South	4	Helmet		0.051	0.216	0.035	75.71	0.413	0.102	4.258	0.001	0.605
P005_11	P005	11	na	South	4	Helmet		0.054	0.142	0.084	62.246	0.756	0.05	1.683	0	-0.024
P005_12	P005	12	na	South	4	Helmet		0.053	0.141	0.012	76.836	0.35	0.062	2.669	-0.007	-0.013
P005_13	P005	13	na	South	4	Helmet		0.066	1.331	0.123	51.329	1.074	0.14	2.79	0.03	0.255
P005_14	P005	14	na	South	4	Helmet		0.054	0.315	-0.064	89.936	-0.018	0.163	7.997	0.007	0.507
P005_15	P005	15	na	South	4	Helmet		0.049	0.15	-0.028	79.228	0.291	0.255	2.199	0.01	0.509
P005_16	P005	16	na	South	4	Helmet		0.057	0.151	-0.052	88.198	0.032	0.127	6.058	0.021	0.516
P005_17	P005	17	na	South	4	Helmet		0.051	0.237	-0.064	89.547	-0.003	0.156	7.706	0.009	0.558
P005_18	P005	18	na	South	4	Helmet		0.058	0.381	-0.022	79.247	0.291	0.125	9.072	0.024	2.636
P005_19	P005	19	na	South	4	Helmet		0.051	0.203	0.099	57.16	0.911	0.06	1.455	-0.009	0.046
P005_2	P005	2	P005_1	South	4	Helmet		0.056	0.244	-0.04	90.652	-0.002	0.145	6.164	0.003	0.909
P005_20	P005	20	na	South	4	Helmet		0.057	0.203	0.076	61.093	0.807	0.096	3.915	0.002	0.212
P005_21	P005	21	na	South	4	Helmet		0.053	0.202	0.045	67.385	0.611	0.127	6.65	-0.004	0.432
P005_22	P005	22	na	South	4	Helmet		0.086	18.349	0.194	37.417	1.474	0.06	0.248	-0.014	0.019
P005_23	P005	23	na	South	4	Helmet		0.056	0.354	0.036	71.255	0.511	0.064	4.44	0.017	0.256
P005_24	P005	24	na	South	4	Helmet		0.052	0.327	-0.039	82.558	0.176	0.049	2.562	0.021	0.261
P005_25	P005	25	na	South	4	Helmet		0.061	7.516	0.178	39.471	1.406	0.053	0.719	-0.003	0.039
P005_26	P005	26	na	South	4	Helmet		0.054	0.254	0.102	58.155	0.864	0.081	3.046	-0.001	-0.005
P005_27	P005	27	na	South	4	Helmet		0.051	0.168	0.037	72.66	0.484	0.111	3.812	-0.008	0.471
P005_28	P005	28	na	South	4	Helmet		0.048	0.199	0.14	50.535	1.095	0.22	30.027	0.028	0.393
P005_29	P005	29	na	South	4	Helmet		0.054	0.302	0.062	63.303	0.744	0.119	12.992	0.002	11.603
P005_3	P005	3	P005_1	South	4	Helmet		0.055	0.241	-0.021	85.965	0.135	0.127	5.491	0.016	0.831
P005_4	P005	4	P005_1	South	4	Helmet		0.053	0.253	-0.036	88.314	0.072	0.12	5.518	0.016	0.933
P005_5	P005	5	P005_1	South	4	Helmet		0.055	0.236	-0.059	93.068	-0.063	0.108	6.527	0.004	0.875
P005_6	P005	6	na	South	4	Helmet		0.055	0.161	0.079	66.184	0.658	0.285	9.553	0	0.518
P005_7	P005	7	na	South	4	Helmet		0.051	0.171	0.081	70.272	0.546	0.349	12.022	0.003	0.555
P005_8	P005	8	na	South	4	Helmet		0.055	0.265	-0.013	82.568	0.202	0.166	6.739	0.005	0.469
P005_9	P005	9	na	South	4	Helmet		0.051	0.217	-0.025	86.348	0.106	0.155	6.036	0.02	0.494
P006_1	P006	1	na	South	4	Belt		0.048	0.241	0.13	52.195	1.048	0.052	1.874	-0.007	-0.007
P006_10	P006	10	na	South	4	Belt		0.049	0.208	0.044	69.974	0.553	0.091	4.594	0.008	0.013
P006_11	P006	11	na	South	4	Belt		0.051	0.299	0.115	56.91	0.926	0.084	2.572	0.013	0.112
P006_12	P006	12	P006_1	South	4	Belt		0.056	0.37	0.017	76.316	0.378	0.067	3.816	-0.02	0.002
P006_13	P006	13	P006_1	South	4	Belt		0.06	0.36	0.003	77.81	0.338	0.079	5.396	0.006	0.024
P006_14	P006	14	P006_1	South	4	Belt		0.051	0.358	0.017	75.307	0.405	0.077	4.118	0.006	0.007
P006_15	P006	15	P006_1	South	4	Belt		0.054	0.327	0.014	76.096	0.385	0.086	5.254	0.025	0.023
P006_16	P006	16	P006_1	South	4	Belt		0.049	0.376	0.007	76.61	0.367	0.06	4.976	0.003	0.014
P006_17	P006	17	na	South	4	Belt		0.052	0.156	0.094	64.984	0.952	0.171	4.13	0.012	0.035
P006_18	P006	18	na	South	4	Belt		0.052	0.321	0.064	67.201	0.823	0.214	7.401	0.016	0.077
P006_19	P006	19	na	South	4	Belt		0.056	0.286	0.074	65.07	0.836	0.249	10.56	0.011	0.105
P006_2	P006	2	na	South	4	Belt		0.048	0.215	0.155	46.623	1.205	0.038	1.118	-0.018	-0.026
P006_20	P006	20	P006_2	South	4	Belt		0.054	0.11	0.029	74.047	0.556	0.223	7.206	0.022	0.02
P006_21	P006	21	P006_2	South	4	Belt		0.05	0.115	0.047	71.961	0.569	0.173	7.024	0.01	0.009
P006_22	P006	22	P006_2	South	4	Belt		0.052	0.1	0.015	76.531	0.443	0.283	7.924	0.022	0.018
P006_23	P006	23	P006_2	South	4	Belt		0.048	0.111	0.023	74.534	0.462	0.216	8.24	0.023	0.013
P006_24	P006	24	P006_2	South	4	Belt		0.053	0.125	0.027	71.842	0.505	0.178	7.118	0.015	0.021
P006_3	P006	3	na	South	4	Belt		0.052	0.314	0.096	61.408	0.792	0.119	4.391	0.025	0.347
P006_4	P006	4	na	South	4	Belt		0.051	0.16	0.062	68.166	0.598	0.105	3.79	0.002	0.015
P006_5	P006	5	na	South	4	Belt		0.054	0.231	0.082	66.143	0.664	0.085	2.19	-0.005	0.104
P006_6	P006	6	na	South	4	Belt		0.062	0.135	0.025	76.119	0.383	0.161	4.643	-0.002	0.027
P006_7	P006	7	na	South	4	Belt		0.054	0.245	0.057	70.997	0.514	0.09	2.857	0.009	0.009
P006_8	P006	8	na	South	4	Belt		0.051	0.169	0.104	61.822	0.778	0.203	1.258	0	0.024
P006_9	P006	9	na	South	4	Belt		0.053	0.232	0.064	67.295	0.622	0.087	3.576	0.019	0.11
P008_1	P008	1	P008_4	South	4	Curiass		0.052	0.17	0.103	60.908	1.024	0.064	6.171	0.047	0.03
P008_10	P008	10	P008_7	South	4	Curiass		0.05	0.147	0.035	77.205	0.528	0.098	9.434	0.001	-0.006
P008_11	P008	11	P008_7	South	4	Curiass		0.054	0.119	0.038	74.494	0.575	0.07	7.629	0.002	-0.017
P008_12	P008	12	P008_7	South	4	Curiass		0.054	0.172	0.063	71.88	0.619	0.083	9.47	0.01	-0.009
P008_13	P008	13	na	South	4	Curiass		0.047	1.422	0.169	42.062	1.354	0.094	1.41	0.008	0.008
P008_14	P008	14	na	South	4	Curiass		0.061	0.319	0.092	62.454	0.842	0.073	1.491	0.017	0.01
P008_15	P008	15	na	South	4	Curiass		0.048	0.19	0.101	61.032	0.857	0.067	4.163	-0.001	-0.023
P008_16	P008	16	P008_5	South	4	Curiass		0.049	0.143	0.069	66.93	0.705	0.087	2.451	-0.001	-0.019
P008_17	P008	17	P008_5	South	4	Curiass		0.051	0.13	0.058	69.318	0.629	0.064	2.202	0.021	-0.016
P008_18	P008	18	P008_5	South	4	Curiass		0.05	0.142	0.067	66.3	0.704	0.08	2.296	0.008	-0.018
P008_19	P008	19	P008_5	South	4	Curiass		0.055	0.132	0.058	70.697	0.587	0.07	2.712	0.011	-0.018
P008_2	P008	2	P008_4	South	4	Curiass		0.051	0.16	0.091	61.687	1.085	0.081	7.179	0.038	0.043
P008_20	P008	20	P008_5	South	4	Curiass		0.052	0.108	0.036	73.016	0.519	0.062	3.771	0.009	-0.01
P008_21	P008	21	na	South	4	Curiass		0.049	0.113	0.057	67.355	0.66	0.083	2.253	-0.002	-0.011
P008_22	P008	22	na	South	4	Curiass		0.049	0.114	0.041	69.436	0.596	0.104	5.868	-0.007	-0.011
P008_23	P008	23	na	South	4	Curiass		0.047	0.248	0.129	55.194	0.982	0.105	2.373	0.002	-0.004
P008_24	P008	24	na	South	4	Curiass		0.047	0.054	-0.041	86.019	0.149	0.142	4.432	0.016	0.001
P008_25	P008	25	na	South	4	Curiass		0.05	0.176	0.112	58.337	0.897	0.075	1.076	0.016	0.001
P008_26	P008	26	na	South	4	Curiass		0.049	0.146	0.069	66.852	0.649	0.123	4.873	0.016	-0.011
P008_27	P008	27	na	South	4	Curiass		0.134	0.26	0.124	53.18	1.035	0.157	4.75	0.005	0.015
P008_28	P008	28	na	South	4	Curiass		0.051	0.161	0.101	59.149	0.867	0.078	2.748	-0.002	-0.017
P008_29	P008	29	na	South	4	Curiass		0.054	0.107	0.022	76.33	0.389	0.057	1.276	0.013	-0.016
P008_3	P008	3	P008_4	South	4	Curiass		0.048	0.173	0.11	60.274	1.072	0.072	4.475	0.017	0.009
P008_30	P008	30	na	South	4	Curiass		0.05	0.201	0.142	49.428	1.134	0.041	2.597	0.013	1.043
P008_31	P008	31	na	South	4	Curiass		0.049	0.19	0.066	65.502	0.675	0.044	5.233	-0.006	3.077
P008_32	P008	32	na	South	4	Curiass		0.048	0.197	0.082	60.568	0.813	0.047	2.844	-0.008	2.951
P008_33	P008	33	na	South	4	Curiass		0.047	0.184	0.053	66.427	0.651	0.062	3.799	0.004	3.611
P008_34	P008	34	na	South	4	Curiass		0.057	0.192	0.109	58.354	0.877	0.049	1.179	-0.005	1.235
P008_35	P008	35	na	South	4	Curiass		0.05	0.152	0.091	62.507	0.755	0.079	6.466	0.011	0.009
P008_36	P008	36	na	South	4	Curiass		0.05	1.203	0.107	59.515	0.846	0.083	0.554	0.017	0.008
P008_37	P008	37	P008_2	South	4	Curiass		0.055	0.205	0.058	66.691	0.646	0.089	1.824	0.023	-0.003
P008_38	P008	38	P008_2	South	4	Curiass		0.051	0.185	0.07	64.223	0.711	0.085	3.036	-0.006	-0.005
P008_39	P008	39	P008_2	South	4	Curiass		0.054	0.2	0.057	65.942	0.674	0.086	2.155	0.002	-0.003
P008_4	P008	4	P008_4	South	4	Curiass		0.054	0.174	0.088	63.373	1.003	0.084	4.952	0.057	0.023
P008_40	P008	40	P008_2	South	4	Curiass		0.049	0.181	0.046	67.593	0.624	0.091	1.613	-0.005	-0.003
P008_41	P008	41	P008_2	South	4	Curiass		0.054	0.175	0.06	65.376	0.686	0.076	4.381	0.021	-0.008
P008_42	P008	42	P008_1	South	4	Curiass		0.049	0.267	0.122	55.522	0.97	0.126	6.829	0.014	0.053
P008_43	P008	43	P008_1	South	4	Curiass		0.049	0.245	0.112	60.571	0.826	0.105	6.9	0.014	0.043
P008_44	P008	44	P008_1	South	4	Curiass		0.047	0.26	0.117	56.784	0.93	0.141	7.047	0.016	0.055
P008_45	P008	45	P008_1	South	4	Curiass		0.052	0.233	0.103	62.056	0.776	0.121	7.196	0.014	0.049
P008_46	P008	46	P008_1	South	4	Curiass		0.055	0.277	0.116	57.157	0.92	0.131	6.233	0.003	0.031
P008_47	P008	47	na	South	4	Curiass		0.05	0.225	0.134	54.413	0.989	0.082	3.992	0.004	0.067
P008_48	P008	48	na	South	4	Curiass		0.055	0.223	0.106	61.825	0.783	0.071	4.606	0.006	0.083
P008_49	P008	49	na	South	4	Curiass		0.051	0.273	0.101	60.448	0.827	0.098	6.454	0.027	0.05
P008_5	P008	5	P008_4	South	4	Curiass		0.056	0.159	0.097	61.104	1.017	0.079	8.012	0.04	0.045
P008_50	P008	50	na	South	4	Curiass		0.05	1.515	0.104	55.439	0.957	0.136	3.211	0.02	0.064
P008_51	P008	51	na	South	4	Curiass		0.051	0.146	0.077	68.598	0.58	0.068	3.518	-0.003	0.009
P008_52	P008	52	na	South	4	Curiass		0.052	0.212	0.058	72.037	0.483	0.064	2.374	0.008	0.021
P008_53	P008	53	na	South	4	Curiass		0.049	0.219	0.17	46.983	1.194	0.055	2.436	-0.003	0.003
P008_54	P008	54	na	South	4	Curiass		0.051	0.15	0.071	68.267	0.595	0.078	4.758	0.023	0.017
P008_55	P008	55	na	South	4	Curiass		0.051	0.251	0.126	54.397	0.995	0.108	5.487	-0.001	0.027
P008_56	P008	56	na	South	4	Curiass		0.106	0.334	0.129	52.513	1.037	0.048	2.046	-0.008	1.127
P008_57	P008	57	na	South	4	Curiass		0.049	0.235	0.153	48.101	1.166	0.108	3.236	-0.005	0.113
P008_58	P008	58	na	South	4	Curiass		0.053	0.205	0.081	59.31	0.841	0.048	2.837	-0.008	1.544
P008_59	P008	59	na	South	4	Curiass		0.057	0.227	0.03	70.355	0.507	0.054	5.914	-0.003	7.082
P008_6	P008	6	na	South	4	Curiass		0.051	0.208	0.073	66.295	0.884	0.152	3.631	0.001	0.127
P008_60	P008	60	na	South	4	Curiass		0.05	0.191	-0.005	74.413	0.392	0.067	9.442	0.002	6.271
P008_61	P008	61	na	South	4	Curiass		0.272	0.403	0.154	45.087	1.242	0.053	0.427	0.011	0.916
P008_62	P008	62	na	South	4	Curiass		0.058	0.258	0.084	62.235	0.764	0.226	2.942	0.017	0.036
P008_63	P008	63	P008_6	South	4	Curiass		0.054	0.069	-0.019	81.088	0.222	0.062	1.541	0.007	-0.021
P008_64	P008	64	P008_6	South	4	Curiass		0.051	0.072	-0.011	80.177	0.255	0.045	1.528	-0.006	-0.024
P008_65	P008	65	P008_6	South	4	Curiass		0.052	0.071	-0.019	80.908	0.224	0.057	1.575	0.024	-0.02
P008_66	P008	66	P008_6	South	4	Curiass		0.051	0.075	-0.013	79.618	0.259	0.045	1.75	0.007	-0.013
P008_67	P008	67	P008_6	South	4	Curiass		0.052	0.062	-0.024	81.78	0.207	0.052	1.464	-0.009	-0.019
P008_68	P008	68	na	South	4	Curiass		0.05	0.241	0.133	50.638	1.09	0.089	2.374	0.014	2.51
P008_69	P008	69	na	South	4	Curiass		0.049	0.248	0.166	46.981	1.192	0.059	1.729	0.02	0.53
P008_7	P008	7	na	South	4	Curiass		0.054	0.311	0.11	56.066	1.077	0.064	2.456	0.014	0.007
P008_70	P008	70	na	South	4	Curiass		0.051	0.233	0.138	52.754	1.042	0.069	1.5	-0.003	0.018
P008_71	P008	71	P008_3	South	4	Curiass		0.049	0.149	0.043	70.828	0.514	0.038	5.958	-0.005	-0.015
P008_72	P008	72	P008_3	South	4	Curiass		0.047	0.164	0.082	64.563	0.697	0.057	5.528	0.005	-0.012
P008_73	P008	73	P008_3	South	4	Curiass		0.052	0.15	0.065	65.537	0.664	0.054	5.359	-0.01	-0.013
P008_74	P008	74	P008_3	South	4	Curiass		0.051	0.134	0.051	69.582	0.545	0.042	5.97	-0.011	-0.019
P008_75	P008	75	P008_3	South	4	Curiass		0.052	0.149	0.038	70.983	0.513	0.051	5.732	-0.004	-0.015
P008_76	P008	76	na	South	4	Curiass		0.058	0.22	0.044	69.41	0.564	0.056	7.909	0.008	-0.012
P008_77	P008	77	na	South	4	Curiass		0.055	5.391	0.076	60.029	0.832	0.071	6.871	0.041	0.024
P008_78	P008	78	P008_8	South	4	Curiass		0.051	0.169	0.046	67.46	0.616	0.054	6.781	0.076	-0.005
P008_79	P008	79	P008_8	South	4	Curiass		0.048	0.199	0.064	63.723	0.722	0.079	8.69	0.084	0.015
P008_8	P008	8	P008_7	South	4	Curiass		0.054	0.144	0.053	74.477	0.645	0.099	8.323	-0.008	-0.007
P008_80	P008	80	P008_8	South	4	Curiass		0.049	0.17	0.06	66.009	0.656	0.059	6.413	0.038	-0.005
P008_81	P008	81	P008_8	South	4	Curiass		0.049	0.18	0.065	64.721	0.698	0.066	5.477	0.067	-0.001
P008_82	P008	82	P008_8	South	4	Curiass		0.048	0.178	0.09	59.887	0.824	0.055	7.933	0.05	-0.008
P008_83	P008	83	na	South	4	Curiass		0.055	3.451	0.038	67.674	0.61	0.053	8.301	0.049	0.02
P008_9	P008	9	P008_7	South	4	Curiass		0.051	0.16	0.07	69.373	0.726	0.082	9.077	0.002	-0.006
VG001_1	VG001	1	na	North	4	Helmet		0.046	0.268	0.119	54.763	0.978	0.374	10.681	0.079	20.928
VG001_10	VG001	10	na	North	4	Helmet		0.05	0.21	0.106	59.714	0.924	0.439	17.735	0.025	0.095
VG001_11	VG001	11	na	North	4	Helmet		0.046	0.247	0.205	36.203	1.5	0.129	-0.078	0.073	0.058
VG001_12	VG001	12	na	North	4	Helmet		0.047	0.214	0.123	53.743	1.047	0.328	12.329	0.014	0.047
VG001_13	VG001	13	na	North	4	Helmet		0.054	0.408	0.114	55.263	0.971	0.285	14.527	0.008	0.166
VG001_14	VG001	14	na	North	4	Helmet		0.047	0.388	0.161	46.555	1.205	0.302	10.43	0.076	13.222
VG001_15	VG001	15	na	North	4	Helmet		0.057	0.407	0.049	65.749	0.99	0.215	7.587	0.008	0.425
VG001_16	VG001	16	na	North	4	Helmet		0.054	0.192	0.072	64.968	0.738	0.353	16.226	0.022	0.068
VG001_17	VG001	17	na	North	4	Helmet		0.052	0.237	0.111	57.326	0.967	0.423	18.817	0.009	0.084
VG001_18	VG001	18	na	North	4	Helmet		0.055	0.218	0.096	60.252	0.874	0.364	16.78	0.006	0.121
VG001_19	VG001	19	na	North	4	Helmet		0.05	0.251	0.148	48.478	1.183	0.502	22.187	0.014	0.214
VG001_2	VG001	2	VG001_1	North	4	Helmet		0.049	0.201	0.078	63.148	0.767	0.456	16.913	0.01	0.093
VG001_20	VG001	20	na	North	4	Helmet		0.048	0.239	0.12	54.689	0.997	0.477	19.722	0.008	0.169
VG001_21	VG001	21	na	North	4	Helmet		0.046	0.232	0.101	57.264	0.932	0.345	19.891	-0.003	2.408
VG001_22	VG001	22	na	North	4	Helmet		0.049	0.289	0.15	47.331	1.209	0.589	25.011	0.004	5.071
VG001_23	VG001	23	na	North	4	Helmet		0.049	0.2	0.094	60.38	0.826	0.349	13.617	-0.004	0.077
VG001_24	VG001	24	na	North	4	Helmet		0.047	0.275	0.169	43.529	1.29	0.241	6.393	0.035	45.709
VG001_25	VG001	25	na	North	4	Helmet		0.05	0.352	0.144	49.738	1.113	0.355	14.256	0.07	13.951
VG001_26	VG001	26	na	North	4	Helmet		0.054	0.248	0.124	51.867	1.071	0.46	24.96	0.008	3.497
VG001_3	VG001	3	VG001_1	North	4	Helmet		0.049	0.201	0.097	61.308	0.818	0.486	17.385	0.004	0.092
VG001_4	VG001	4	VG001_1	North	4	Helmet		0.052	0.19	0.077	64.748	0.717	0.449	16.467	0.022	0.085
VG001_5	VG001	5	VG001_1	North	4	Helmet		0.049	0.211	0.09	61.394	0.815	0.49	17.405	-0.008	0.085
VG001_6	VG001	6	VG001_1	North	4	Helmet		0.048	0.195	0.083	63.572	0.752	0.463	17.1	0.015	0.091
VG001_7	VG001	7	na	North	4	Helmet		0.051	0.243	0.118	54.739	1.071	0.49	20.59	0	0.162
VG001_8	VG001	8	na	North	4	Helmet		0.051	0.232	0.136	52.528	1.055	0.476	21.783	0.012	0.158
VG001_9	VG001	9	na	North	4	Helmet		0.048	0.209	0.097	58.001	0.914	0.463	19.9	0.012	0.1
VG002_1	VG002	1	VG002_1	North	4	Helmet		0.051	0.237	0.025	71.856	0.582	0.099	13.787	0.112	0.115
VG002_10	VG002	10	na	North	4	Helmet		0.061	0.383	-0.013	79.458	0.33	0.249	7.257	0.047	0.256
VG002_11	VG002	11	na	North	4	Helmet		0.053	0.246	0.04	69.588	0.599	0.12	13.349	0.095	0.1
VG002_12	VG002	12	na	North	4	Helmet		0.048	0.219	0.116	51.599	2.593	0.075	9.283	0.021	13.523
VG002_13	VG002	13	na	North	4	Helmet		0.059	0.282	0.095	54.211	5.404	0.12	6.689	0.055	0.989
VG002_14	VG002	14	na	North	4	Helmet		0.049	0.213	0.062	65.047	0.818	0.101	11.042	0.078	0.077
VG002_15	VG002	15	na	North	4	Helmet		0.055	0.259	0.006	78.178	0.373	0.082	12.951	0.098	0.059
VG002_16	VG002	16	na	North	4	Helmet		0.05	0.31	0.086	57.822	1.003	0.123	20.553	0.117	0.188
VG002_17	VG002	17	na	North	4	Helmet		0.084	0.605	0.032	67.933	4.053	0.116	7.926	0.061	0.634
VG002_18	VG002	18	na	North	4	Helmet		0.053	0.349	0.094	56.513	1.576	0.088	8.378	0.051	0.148
VG002_19	VG002	19	na	North	4	Helmet		0.055	0.13	-0.026	82.618	0.293	0.051	7.429	0.042	0.051
VG002_2	VG002	2	VG002_1	North	4	Helmet		0.053	0.233	0.018	72.866	0.565	0.103	14.005	0.069	0.121
VG002_20	VG002	20	na	North	4	Helmet		0.057	0.243	0.026	70.591	0.608	0.103	13.965	0.087	0.085
VG002_21	VG002	21	na	North	4	Helmet		0.059	0.196	-0.005	76.373	0.436	0.09	13.832	0.131	0.087
VG002_22	VG002	22	na	North	4	Helmet		0.053	0.296	0.079	59.214	0.935	0.117	16.34	0.094	0.138
VG002_23	VG002	23	na	North	4	Helmet		0.262	12.667	0.2	36.506	2.306	0.137	-0.069	0.015	0.064
VG002_24	VG002	24	na	North	4	Helmet		0.053	0.348	0.03	70.596	0.586	0.631	11.983	0.092	0.286
VG002_25	VG002	25	na	North	4	Helmet		0.067	1.829	0.208	36.21	6.068	0.06	-0.128	0.018	0.005
VG002_26	VG002	26	na	North	4	Helmet		0.052	0.205	-0.002	77.897	0.38	0.086	11.939	0.11	0.062
VG002_27	VG002	27	na	North	4	Helmet		0.054	0.182	0.04	68.404	0.735	0.06	9.451	0.043	0.132
VG002_28	VG002	28	na	North	4	Helmet		0.051	0.138	-0.017	77.997	0.367	0.076	12.292	0.098	0.039
VG002_3	VG002	3	VG002_1	North	4	Helmet		0.05	0.281	0.074	61.896	0.87	0.116	18.841	0.117	0.188
VG002_4	VG002	4	VG002_1	North	4	Helmet		0.052	0.278	0.053	65.508	0.769	0.129	17.848	0.111	0.172
VG002_5	VG002	5	VG002_1	North	4	Helmet		0.057	0.251	0.041	69.111	0.657	0.116	16.032	0.097	0.14
VG002_6	VG002	6	na	North	4	Helmet		0.047	0.194	-0.009	77.77	0.439	0.055	9.76	0.076	0.06
VG002_7	VG002	7	na	North	4	Helmet		0.055	0.237	0.03	71.68	0.592	0.147	17.687	0.16	0.107
VG002_8	VG002	8	na	North	4	Helmet		0.584	13.871	0.198	36.727	3.093	0.06	-0.092	-0.006	0.093
VG002_9	VG002	9	na	North	4	Helmet		0.052	0.278	0.081	59.097	0.94	0.095	14.047	0.065	0.093
VG003_1	VG003	1	VG003_1	North	4	Helmet		0.049	0.299	0.061	65.607	0.957	0.135	11.083	0.086	0.403
VG003_10	VG003	10	na	North	4	Helmet		0.05	0.212	0.066	64.675	0.785	0.06	10.559	0.043	0.059
VG003_11	VG003	11	na	North	4	Helmet		0.053	0.232	0.068	64.738	0.847	0.079	14.325	0.03	0.139
VG003_12	VG003	12	na	North	4	Helmet		0.05	0.239	0.104	56.173	1.033	0.056	4.518	0.04	0.112
VG003_13	VG003	13	na	North	4	Helmet		0.049	0.248	0.095	56.915	1.001	0.059	12.108	0.027	0.142
VG003_14	VG003	14	na	North	4	Helmet		0.053	0.222	-0.028	83.602	0.255	0.061	8.502	0.019	0.01
VG003_15	VG003	15	na	North	4	Helmet		0.054	0.088	-0.028	85.44	0.204	0.043	9.596	0.044	-0.003
VG003_16	VG003	16	na	North	4	Helmet		0.06	6.412	-0.007	76.799	0.478	0.044	8.261	0.022	0.015
VG003_17	VG003	17	na	North	4	Helmet		0.073	12.238	0.018	70.197	0.728	0.064	7.576	0.03	0.038
VG003_18	VG003	18	na	North	4	Helmet		0.057	3.228	-0.003	77.639	0.522	0.056	8.391	0.045	0.029
VG003_19	VG003	19	na	North	4	Helmet		0.052	0.217	0.032	69.442	0.675	0.103	16.521	0.188	0.89
VG003_2	VG003	2	VG003_1	North	4	Helmet		0.05	0.21	0.037	73.186	0.71	0.072	12.698	0.063	0.07
VG003_20	VG003	20	na	North	4	Helmet		0.053	0.129	-0.014	80.738	0.407	0.075	11.7	0.05	0.047
VG003_21	VG003	21	na	North	4	Helmet		0.053	0.378	0.036	69.735	0.683	0.098	11.853	0.11	0.319
VG003_22	VG003	22	na	North	4	Helmet		0.058	0.345	0.031	69.403	0.696	0.125	13.351	0.1	0.456
VG003_23	VG003	23	na	North	4	Helmet		0.051	0.317	0.045	66.443	0.786	0.088	10.15	0.082	0.344
VG003_24	VG003	24	na	North	4	Helmet		0.057	0.145	-0.001	78.351	0.387	0.079	12.342	0.033	0.047
VG003_25	VG003	25	na	North	4	Helmet		0.057	0.263	0.033	71.358	0.66	0.045	8.676	0.142	0.346
VG003_26	VG003	26	na	North	4	Helmet		0.048	0.433	0.189	38.98	1.464	0.05	2.491	0.007	0
VG003_27	VG003	27	na	North	4	Helmet		0.048	0.299	0.039	66.476	0.747	0.053	8.275	0.111	0.238
VG003_3	VG003	3	VG003_1	North	4	Helmet		0.052	0.188	0.031	72.877	0.681	0.081	13.846	0.025	0.065
VG003_4	VG003	4	VG003_1	North	4	Helmet		0.053	0.167	0.007	76.506	0.56	0.075	13.368	0.057	0.067
VG003_5	VG003	5	VG003_1	North	4	Helmet		0.05	0.129	-0.016	81.986	0.357	0.069	13.21	0.033	0.037
VG003_6	VG003	6	na	North	4	Helmet		0.05	0.134	-0.019	82.702	0.324	0.068	12.393	0.05	0.027
VG003_7	VG003	7	na	North	4	Helmet		0.051	0.137	-0.021	81.643	0.322	0.071	13.642	0.052	0.045
VG003_8	VG003	8	na	North	4	Helmet		0.055	0.143	-0.024	82.272	0.331	0.058	12.754	0.047	0.03
VG003_9	VG003	9	na	North	4	Helmet		0.052	0.112	-0.022	83.45	0.393	0.06	11.706	0.062	0.019
VG004a_1a	VG004a	1a	VG004a_1	North	4	Shield		0.048	0.391	0.17	51.47	1.107	0.509	20.01	0.011	0.176
VG004a_2a	VG004a	2a	VG004a_1	North	4	Shield		0.05	0.386	0.151	52.667	1.069	0.484	20.049	0.006	0.181
VG004a_3a	VG004a	3a	VG004a_1	North	4	Shield		0.054	0.403	0.149	54.319	1.026	0.629	20.144	0.012	0.177
VG004a_4a	VG004a	4a	VG004a_1	North	4	Shield		0.046	0.371	0.164	50.747	1.122	0.475	16.756	0.012	0.149
VG004a_5a	VG004a	5a	VG004a_1	North	4	Shield		0.049	0.382	0.137	56.056	0.966	0.537	19.169	-0.001	0.158
VG004a_6a	VG004a	6a	na	North	4	Shield		0.056	0.393	0.056	74.688	0.425	0.144	7.871	0.006	0.027
VG004a_7a	VG004a	7a	na	North	4	Shield		0.064	3.846	0.167	42.368	1.555	0.166	10.458	0	0.14
VG004b_1b	VG004b	1b	na	North	4	Shield		0.06	0.594	0.096	57.458	0.924	0.124	6.237	0.037	0.019
VG004b_2b	VG004b	2b	na	North	4	Shield		0.054	0.504	0.094	58.042	0.911	0.109	6.371	0.057	0.026
VG004b_3b	VG004b	3b	na	North	4	Shield		0.052	0.312	0.098	55.509	0.964	0.215	12.367	0.037	0.035
VG004b_4b	VG004b	4b	na	North	4	Shield		0.056	0.376	0.083	59.823	0.867	0.188	11.507	0.019	0.021
VG004b_5b	VG004b	5b	na	North	4	Shield		0.054	0.415	0.038	68.941	0.582	0.098	8.803	0.036	0.005
VG004c_1c	VG004c	1c	na	North	4	Shield		0.056	0.387	0.073	61.867	0.776	0.111	13.532	0.015	0.022
VG004d_1d	VG004d	1d	na	North	4	Shield		0.056	0.568	0.024	73.859	0.622	0.254	4.186	0.019	0.062
VG004d_2d	VG004d	2d	na	North	4	Shield		0.058	0.533	0.015	77.231	0.515	0.321	4.357	0.021	0.079
VG004d_3d	VG004d	3d	na	North	4	Shield		0.06	0.541	0.057	65.291	0.802	0.262	3.349	0.01	0.067
VG004d_4d	VG004d	4d	na	North	4	Shield		0.058	0.42	0.035	71.223	0.651	0.584	9.098	0.057	0.163
VG004d_5d	VG004d	5d	na	North	4	Shield		0.056	0.349	0.022	75.845	0.51	0.477	7.674	0.037	0.126
VG004d_6d	VG004d	6d	na	North	4	Shield		0.061	0.451	0.043	69.977	0.642	0.475	6.646	0.019	0.104
VG004e_1e	VG004e	1e	na	North	4	Shield		0.058	0.626	0.071	62.934	0.811	0.098	6.076	0.061	0.017
VG004e_2e	VG004e	2e	na	North	4	Shield		0.055	0.447	0.079	60.329	0.892	0.164	10.252	0.034	0.026
VG004e_3e	VG004e	3e	na	North	4	Shield		0.057	0.759	0.073	62.382	0.833	0.131	6.918	0.007	0.051
VG004e_4e	VG004e	4e	na	North	4	Shield		0.05	0.301	0.056	65.298	0.742	0.173	12.967	0.042	0.03
VG004e_5e	VG004e	5e	na	North	4	Shield		0.052	0.321	0.083	61.636	0.836	0.197	14.842	0.029	0.056
VG004e_6e	VG004e	6e	na	North	4	Shield		0.057	0.492	0.093	56.504	0.978	0.157	10.782	0.032	0.039
VG004f_1f	VG004f	1f	na	North	4	Shield		0.086	0.721	0.086	58.995	0.88	0.07	8.479	0.016	0.012
VG004f_2f	VG004f	2f	na	North	4	Shield		0.05	0.262	0.132	49.261	1.15	0.069	8.586	0.001	0.014
VG004f_3f	VG004f	3f	na	North	4	Shield		0.053	0.462	0.087	57.732	0.906	0.06	9.226	0.005	0.016
VG004g_1g	VG004g	1g	na	North	4	Shield		0.065	0.872	0.036	73.951	0.695	0.157	3.183	0.006	0.026
VG004g_2g	VG004g	2g	na	North	4	Shield		0.06	1.005	0.046	70.235	0.78	0.168	4.15	0.021	0.041
VG004g_3g	VG004g	3g	na	North	4	Shield		0.053	0.657	0.101	56.891	1.022	0.112	3.199	-0.002	0.009
VG004g_4g	VG004g	4g	na	North	4	Shield		0.055	0.561	0.068	63.835	0.828	0.174	6.812	0.01	0.053
VG004g_5g	VG004g	5g	na	North	4	Shield		0.058	0.552	0.04	70.285	0.622	0.236	10.585	0.016	0.056
VG004g_6g	VG004g	6g	na	North	4	Shield		0.059	0.563	0.034	71.895	0.582	0.221	11.62	0.014	0.066
VG004g_7g	VG004g	7g	na	North	4	Shield		0.054	0.451	0.027	72.351	0.533	0.249	11.822	0.004	0.065
VG004g_8g	VG004g	8g	na	North	4	Shield		0.056	0.702	0.049	67.011	0.664	0.235	11.286	0.01	0.072
VG004g_9g	VG004g	9g	na	North	4	Shield		0.062	0.647	0.013	74.743	0.423	0.202	10.694	0.002	0.057
VG006_1	VG006	1	na	North	8	Belt		0.053	0.208	0.124	56.872	1.057	0.519	12.97	0.429	1.346
VG006_10	VG006	10	VG006_1	North	8	Belt		0.048	0.314	0.138	52.718	1.118	0.439	14.048	0.441	1.249
VG006_11	VG006	11	VG006_1	North	8	Belt		0.051	0.306	0.11	59.958	0.939	0.708	18.028	0.567	1.644
VG006_12	VG006	12	VG006_1	North	8	Belt		0.055	0.297	0.084	65.169	0.813	0.713	18.945	0.653	1.679
VG006_13	VG006	13	VG006_1	North	8	Belt		0.047	0.31	0.098	62.474	0.867	0.809	21.05	0.725	1.913
VG006_14	VG006	14	na	North	8	Belt		0.052	0.394	0.101	62.063	0.917	0.642	18.917	0.615	1.525
VG006_15	VG006	15	na	North	8	Belt		0.048	0.242	0.129	56.498	1.033	0.583	12.587	0.413	1.532
VG006_16	VG006	16	na	North	8	Belt		0.05	0.205	0.178	52.994	1.204	0.564	10.849	0.38	1.6
VG006_17	VG006	17	na	North	8	Belt		0.049	0.211	0.098	65.334	0.859	0.479	13.699	0.504	1.213
VG006_18	VG006	18	na	North	8	Belt		0.049	0.216	0.092	61.553	0.867	0.21	7.745	0.245	0.518
VG006_19	VG006	19	na	North	8	Belt		0.046	0.259	0.118	54.855	1.037	0.533	9.038	0.352	0.878
VG006_20	VG006	20	na	North	8	Belt		0.055	0.443	0.11	58.914	0.937	0.312	8.301	0.295	0.72
VG006_3	VG006	3	na	North	8	Belt		0.054	0.45	0.092	59.529	0.941	0.74	16.633	0.605	1.368
VG006_4	VG006	4	na	North	8	Belt		0.06	3.065	0.087	57.796	0.994	0.297	12.78	0.45	0.813
VG006_5	VG006	5	na	North	8	Belt		0.054	0.272	0.049	74.034	0.556	0.401	15.577	0.559	1.086
VG006_6	VG006	6	na	North	8	Belt		0.051	0.413	0.12	58.499	0.95	0.603	19.421	0.661	1.412
VG006_7	VG006	7	na	North	8	Belt		0.049	0.295	0.119	58.003	0.999	0.418	15.133	0.462	1.2
VG006_8	VG006	8	na	North	8	Belt		0.048	0.272	0.14	55.274	1.109	0.522	17.023	0.508	1.585
VG006_9	VG006	9	VG006_1	North	8	Belt		0.047	0.306	0.12	54.633	1.047	0.474	13.824	0.433	1.25
VG007_1	VG007	1	#N/A	#N/A	#N/A	#N/A		0.057	0.22	0.077	63.848	0.766	0.115	13.997	0.011	0.092
VG007_2	VG007	2	#N/A	#N/A	#N/A	#N/A		0.05	0.211	0.101	55.568	0.983	0.095	9.325	0.008	0.056
VG007_3	VG007	3	#N/A	#N/A	#N/A	#N/A		0.051	0.205	0.076	62.844	0.791	0.116	12.864	0.031	0.084
VG007_4	VG007	4	#N/A	#N/A	#N/A	#N/A		0.055	0.411	0.1	57.701	0.927	0.074	8.392	0.021	0.04
VG008_1	VG008	1	VG008_1	North	6	Greave		0.05	0.22	0.033	72.415	0.466	0.045	8.35	0.013	-0.008
VG008_10	VG008	10	na	North	6	Greave		0.06	0.22	-0.034	82.578	0.168	0.05	7.437	0.011	-0.001
VG008_11	VG008	11	na	North	6	Greave		0.058	0.538	0.006	80.439	0.231	0.121	0.956	0.007	0.051
VG008_12	VG008	12	na	North	6	Greave		0.053	0.187	0.039	70.404	0.512	0.072	14.047	-0.004	0.01
VG008_2	VG008	2	VG008_1	North	6	Greave		0.054	0.214	-0.005	81.575	0.21	0.066	10.552	-0.004	0.014
VG008_3	VG008	3	VG008_1	North	6	Greave		0.057	0.216	0.007	80.094	0.242	0.059	10.811	0.012	-0.001
VG008_4	VG008	4	VG008_1	North	6	Greave		0.051	0.224	0.007	78.54	0.289	0.07	11.787	0.013	0.008
VG008_5	VG008	5	VG008_1	North	6	Greave		0.051	0.212	0.008	78.494	0.283	0.067	11.165	0.006	0.006
VG008_6	VG008	6	na	North	6	Greave		0.055	0.376	0.023	73.799	0.424	0.061	4.88	0.003	-0.015
VG008_7	VG008	7	na	North	6	Greave		0.065	0.573	-0.021	81.849	0.208	0.055	7.441	0.005	0.004
VG008_8	VG008	8	na	North	6	Greave		0.061	0.337	-0.032	90.158	-0.046	0.056	9.433	-0.004	0.002
VG008_9	VG008	9	na	North	6	Greave		0.055	0.291	0.001	77.712	0.305	0.052	7.139	-0.002	0
VG009_1	VG009	1	VG009_1	North	6	Greave		0.055	0.119	0.003	80.845	0.224	0.068	7.658	0.01	-0.012
VG009_10	VG009	10	na	North	6	Greave		0.055	0.223	-0.041	85.373	0.08	0.056	7.965	0.023	0.002
VG009_11	VG009	11	na	North	6	Greave		0.053	0.479	0.022	80.84	0.227	0.133	0.977	0.012	0.054
VG009_12	VG009	12	na	North	6	Greave		0.056	0.115	0.01	77.475	0.33	0.08	10.301	0.002	0.004
VG009_2	VG009	2	VG009_1	North	6	Greave		0.051	0.134	0.018	77.542	0.319	0.046	7.029	0.008	-0.009
VG009_3	VG009	3	VG009_1	North	6	Greave		0.054	0.106	-0.004	81.94	0.178	0.043	7.781	-0.003	-0.016
VG009_4	VG009	4	VG009_1	North	6	Greave		0.055	0.083	-0.03	86.65	0.055	0.054	8.777	-0.007	-0.005
VG009_5	VG009	5	VG009_1	North	6	Greave		0.057	0.083	-0.019	87.037	0.048	0.051	8.741	-0.006	-0.005
VG009_6	VG009	6	na	North	6	Greave		0.059	0.231	0.021	76.745	0.354	0.043	6.985	-0.005	-0.008
VG009_7	VG009	7	na	North	6	Greave		0.063	0.302	-0.01	84.194	0.18	0.089	9.25	-0.013	0.015
VG009_8	VG009	8	na	North	6	Greave		0.068	0.195	-0.029	87.014	0.062	0.045	8.864	-0.002	0.004
VG009_9	VG009	9	na	North	6	Greave		0.058	0.46	0.028	75.095	0.394	0.068	9.699	0.017	0
VG010_1	VG010	1	na	North	6	Helmet		0.051	0.231	0.164	46.465	1.215	0.114	3.47	-0.009	0.207
VG010_10	VG010	10	VG010_1	North	6	Helmet		0.056	0.306	0.016	73.173	0.461	0.351	17.065	0.032	0.07
VG010_11	VG010	11	na	North	6	Helmet		0.053	0.15	-0.033	83.985	0.137	0.111	11.235	0.047	0.018
VG010_12	VG010	12	na	North	6	Helmet		0.05	0.265	0.086	63.428	0.753	0.488	12.558	0.025	1.682
VG010_13	VG010	13	na	North	6	Helmet		0.052	0.252	-0.003	77.717	0.325	0.273	14.055	0.054	0.075
VG010_14	VG010	14	na	North	6	Helmet		0.053	0.262	0.066	66.619	0.647	0.443	13.051	0.026	2.362
VG010_15	VG010	15	na	North	6	Helmet		0.05	0.261	0.076	63.66	0.751	0.243	9.658	0.014	2.314
VG010_16	VG010	16	na	North	6	Helmet		0.058	0.264	0.015	76.085	0.375	0.28	14.436	0.064	0.054
VG010_17	VG010	17	na	North	6	Helmet		0.053	0.258	-0.001	77.108	0.347	0.288	13.898	0.064	0.041
VG010_18	VG010	18	na	North	6	Helmet		0.048	0.236	0.164	45.382	1.236	0.068	1.999	-0.009	-0.016
VG010_2	VG010	2	na	North	6	Helmet		0.057	0.217	-0.008	77.847	0.323	0.195	12.547	0.027	0.022
VG010_3	VG010	3	na	North	6	Helmet		0.051	0.202	-0.001	76.394	0.365	0.21	12.502	0.046	0.023
VG010_4	VG010	4	na	North	6	Helmet		0.053	0.208	0.033	71.178	0.511	0.16	10.978	0.042	0.022
VG010_5	VG010	5	na	North	6	Helmet		0.05	0.179	0.017	75.044	0.402	0.164	10.517	0.052	0.004
VG010_6	VG010	6	VG010_1	North	6	Helmet		0.049	0.291	0.019	73.28	0.462	0.365	17.116	0.048	0.063
VG010_7	VG010	7	VG010_1	North	6	Helmet		0.055	0.296	0.008	73.165	0.458	0.331	17.083	0.057	0.07
VG010_8	VG010	8	VG010_1	North	6	Helmet		0.055	0.31	0.018	73.862	0.448	0.365	17.283	0.042	0.069
VG010_9	VG010	9	VG010_1	North	6	Helmet		0.054	0.309	0.025	72.882	0.471	0.348	17.199	0.034	0.052
VG011_1	VG011	1	VG011_1	North	6	Shield		0.087	0.436	-0.005	82.731	0.497	0.059	5.245	-0.001	0.009
VG011_10	VG011	10	VG011_2	North	6	Shield		0.057	0.152	-0.04	85.485	0.236	0.058	10.367	0.001	-0.006
VG011_11	VG011	11	na	North	6	Shield		0.075	0.261	-0.028	82.42	0.307	0.049	10.594	-0.005	-0.014
VG011_12	VG011	12	na	North	6	Shield		0.096	0.176	-0.066	91.517	0.055	0.312	10.071	0.012	0.013
VG011_13	VG011	13	na	North	6	Shield		0.067	0.185	-0.041	84.768	0.231	0.133	12.707	-0.009	0.011
VG011_14	VG011	14	na	North	6	Shield		0.073	0.414	-0.054	89.825	0.063	0.062	5.14	-0.008	0.015
VG011_15	VG011	15	na	North	6	Shield		0.055	0.251	-0.049	87.8	0.101	0.062	11.39	0.001	0.041
VG011_16	VG011	16	VG011_3	North	6	Shield		0.1	0.859	-0.011	74.213	0.851	0.302	10.849	0.014	1.081
VG011_17	VG011	17	VG011_3	North	6	Shield		0.129	0.946	0.003	72.108	1.017	0.288	13.252	-0.007	1.146
VG011_18	VG011	18	VG011_3	North	6	Shield		0.111	0.902	-0.004	74.183	0.857	0.325	12.19	-0.002	1.102
VG011_19	VG011	19	VG011_3	North	6	Shield		0.123	0.947	0.003	71.733	0.871	0.376	14.036	0.011	1.264
VG011_2	VG011	2	VG011_1	North	6	Shield		0.086	0.389	-0.039	86.465	0.39	0.055	6.692	0	0.007
VG011_20	VG011	20	VG011_3	North	6	Shield		0.115	0.923	-0.012	74.477	0.856	0.32	12.188	0.001	1.134
VG011_3	VG011	3	VG011_1	North	6	Shield		0.082	0.377	-0.019	84.51	0.434	0.062	5.903	0.011	-0.003
VG011_4	VG011	4	VG011_1	North	6	Shield		0.091	0.432	-0.045	87.894	0.324	0.052	6.164	0.001	-0.002
VG011_5	VG011	5	VG011_1	North	6	Shield		0.08	0.422	-0.051	88.848	0.265	0.086	6.465	0.015	0.003
VG011_6	VG011	6	VG011_2	North	6	Shield		0.055	0.146	-0.062	91.45	0.161	0.052	10.64	-0.004	-0.018
VG011_7	VG011	7	VG011_2	North	6	Shield		0.055	0.137	-0.054	90.064	0.158	0.052	10.924	0.009	-0.011
VG011_8	VG011	8	VG011_2	North	6	Shield		0.057	0.188	-0.024	83.505	0.339	0.059	10.049	0.006	-0.002
VG011_9	VG011	9	VG011_2	North	6	Shield		0.059	0.236	0.007	77.358	0.464	0.05	9.112	-0.005	0.004
VG015_1	VG015	1	VG015_1	North	8	Helmet		0.046	0.426	0.156	58.802	1.257	0.914	18.431	0.267	2.64
VG012_1	VG012	1	VG012_1	North	8	Helmet		0.051	0.773	0.142	47.808	1.87	0.265	24.981	0.04	0.847
VG015_10	VG015	10	na	North	8	Helmet		0.049	0.842	0.189	40.425	1.794	0.942	28.974	0.652	4.423
VG012_10	VG012	10	na	North	8	Helmet		0.046	0.474	0.191	42.921	1.657	0.626	22.78	0.309	1.909
VG015_11	VG015	11	na	North	8	Helmet		0.047	0.697	0.181	41.547	1.532	0.453	29.878	-0.006	1.604
VG012_11	VG012	11	na	North	8	Helmet		0.047	0.405	0.138	51.935	1.372	0.676	22.439	0.297	2.128
VG015_12	VG015	12	na	North	8	Helmet		0.047	0.365	0.198	42.651	1.414	0.555	8.781	0.253	1.804
VG012_12	VG012	12	na	North	8	Helmet		0.051	0.524	0.195	45.408	1.716	1.303	35.751	0.441	3.787
VG015_13	VG015	13	na	North	8	Helmet		0.066	1.48	0.2	36.78	5.056	3.006	11.391	-0.001	4.925
VG012_13	VG012	13	na	North	8	Helmet		0.048	0.416	0.123	53.953	1.152	0.754	20.01	0.3	2.832
VG015_14	VG015	14	na	North	8	Helmet		0.048	0.696	0.182	41.468	1.73	0.655	45.928	0.052	1.391
VG012_14	VG012	14	na	North	8	Helmet		0.047	0.388	0.197	42.474	1.344	0.795	20.136	0.276	2.178
VG015_15	VG015	15	na	North	8	Helmet		0.052	0.906	0.193	38.188	9.525	0.245	14.559	0.016	1.245
VG012_15	VG012	15	na	North	8	Helmet		0.048	0.485	0.182	55.674	1.349	1.103	24.437	0.299	2.871
VG015_16	VG015	16	na	North	8	Helmet		0.046	0.36	0.21	38.934	1.466	0.73	14.496	0.283	2.63
VG015_17	VG015	17	na	North	8	Helmet		0.044	0.284	0.202	36.733	1.503	0.159	3.719	0.033	0.45
VG015_18	VG015	18	na	North	8	Helmet		0.049	0.38	0.166	48.142	1.219	0.45	17.384	0.228	1.56
VG015_19	VG015	19	na	North	8	Helmet		0.05	0.601	0.167	48.259	1.562	0.793	26.332	0.366	2.189
VG015_2	VG015	2	VG015_1	North	8	Helmet		0.051	0.468	0.161	58.093	1.275	1.011	21.556	0.321	2.515
VG012_2	VG012	2	VG012_1	North	8	Helmet		0.06	0.931	0.14	48.664	2.002	0.401	33.625	0.044	1.167
VG015_20	VG015	20	na	North	8	Helmet		0.048	0.403	0.206	42.763	1.614	1.17	21.485	0.407	3.989
VG015_21	VG015	21	na	North	8	Helmet		0.047	0.309	0.185	44.998	1.287	0.773	14.231	0.212	3.009
VG015_22	VG015	22	na	North	8	Helmet		0.048	0.577	0.167	47.205	1.488	0.552	19.614	0.361	2.541
VG015_23	VG015	23	na	North	8	Helmet		0.055	0.366	0.106	63.155	0.791	0.605	26.697	0.439	1.554
VG015_24	VG015	24	na	North	8	Helmet		0.045	0.408	0.159	46.752	1.459	0.499	14.471	0.178	1.091
VG015_25	VG015	25	na	North	8	Helmet		0.047	0.365	0.181	47.828	1.205	0.665	25.573	0.412	1.848
VG015_3	VG015	3	VG015_1	North	8	Helmet		0.049	0.424	0.13	60.45	1.151	1.055	19.919	0.312	2.879
VG012_3	VG012	3	VG012_1	North	8	Helmet		0.05	0.756	0.141	48.707	1.862	0.273	25.007	0.023	0.896
VG015_4	VG015	4	VG015_1	North	8	Helmet		0.05	0.461	0.157	58.51	1.213	1.022	20.633	0.289	2.708
VG012_4	VG012	4	VG012_1	North	8	Helmet		0.054	0.794	0.13	49.58	1.796	0.327	28.409	-0.005	0.892
VG015_5	VG015	5	VG015_1	North	8	Helmet		0.049	0.428	0.143	59.641	1.135	1.046	20.663	0.287	2.961
VG012_5	VG012	5	VG012_1	North	8	Helmet		0.049	0.72	0.14	48.437	1.778	0.379	31.23	0.022	1.047
VG015_6	VG015	6	na	North	8	Helmet		0.058	1.895	0.147	44.413	3.203	0.135	3.309	0.04	0.294
VG012_6	VG012	6	na	North	8	Helmet		0.057	0.401	0.118	54.945	1.301	0.675	17.211	0.232	1.691
VG015_7	VG015	7	na	North	8	Helmet		0.065	0.886	0.178	42.297	4.551	0.356	27.593	0.033	2.404
VG012_7	VG012	7	na	North	8	Helmet		0.048	0.495	0.165	48.158	1.428	0.753	22.832	0.302	2.063
VG015_8	VG015	8	na	North	8	Helmet		0.049	0.789	0.17	43.722	1.747	0.576	39.946	0.034	1.617
VG012_8	VG012	8	na	North	8	Helmet		0.048	0.442	0.138	51.845	1.482	0.762	23.337	0.329	2.146
VG015_9	VG015	9	na	North	8	Helmet		0.047	0.643	0.194	39.22	1.527	0.404	29.672	0.026	1.137
VG012_9	VG012	9	na	North	8	Helmet		0.05	0.416	0.157	53.781	1.273	0.597	17.463	0.21	1.858
VG013_1	VG013	1	VG013_1	North	8	Shield	Y	0.139	0.331	0.208	36.216	13.128	0.13	0.088	-0.001	24.977
VG013_10	VG013	10	na	North	8	Shield		0.047	0.336	0.193	40.15	1.441	0.332	17.184	0.101	0.647
VG013_11	VG013	11	na	North	8	Shield		0.051	0.417	0.453	42.291	1.384	0.359	22.522	0.089	0.764
VG013_12	VG013	12	na	North	8	Shield		0.051	0.34	0.2	40.257	1.452	0.376	18.705	0.095	0.828
VG013_13	VG013	13	na	North	8	Shield	Y	0.091	0.481	0.21	36.273	13.72	0.116	0.719	0.051	44.237
VG013_14	VG013	14	na	North	8	Shield	Y	0.08	0.335	0.203	36.191	7.843	0.049	0.211	-0.003	14.984
VG013_15	VG013	15	na	North	8	Shield	Y	0.142	0.643	0.204	36.279	17.851	0.052	0.454	0.014	28.514
VG013_16	VG013	16	na	North	8	Shield	Y	0.099	0.373	0.207	36.202	8.887	0.089	3.151	0.028	21.336
VG013_17	VG013	17	na	North	8	Shield		0.05	0.464	0.189	43.357	1.378	0.34	25.053	0.163	0.732
VG013_2	VG013	2	VG013_1	North	8	Shield	Y	0.149	0.358	0.206	36.221	13.506	0.134	0.124	0.006	26.571
VG013_3	VG013	3	VG013_1	North	8	Shield	Y	0.138	0.335	0.208	36.22	13.602	0.104	0.175	0.019	22.431
VG013_4	VG013	4	VG013_1	North	8	Shield	Y	0.14	0.427	0.206	36.23	14.295	0.13	0.139	0.014	26.129
VG013_5	VG013	5	VG013_1	North	8	Shield	Y	0.142	0.35	0.206	36.239	15.153	0.124	0.243	0.018	25.097
VG013_6	VG013	6	na	North	8	Shield	Y	0.134	0.414	0.207	36.288	11.645	0.046	3.568	0.013	13.482
VG013_7	VG013	7	na	North	8	Shield		0.047	0.304	0.262	39.228	1.467	0.743	17.789	0.943	1.082
VG013_8	VG013	8	na	North	8	Shield		0.047	0.406	0.234	41.561	1.403	0.989	14.284	0.749	1.375
VG013_9	VG013	9	na	North	8	Shield		0.053	0.537	0.17	45.22	1.785	0.494	36.749	0.176	2.318
VG016_1	VG016	1	VG016_1	North	8	Shield		0.056	0.863	-0.015	77.432	0.333	0.096	9.354	0.044	1.02
VG016_2	VG016	2	VG016_1	North	8	Shield		0.052	0.806	-0.012	76.527	0.363	0.083	9.093	0.026	0.989
VG016_3	VG016	3	VG016_1	North	8	Shield		0.055	1.197	0.017	71.903	0.546	0.162	9.719	0.033	2.493
VG016_4	VG016	4	VG016_1	North	8	Shield		0.053	1.321	0.034	67.425	0.712	0.062	6.049	0.019	0.963
VG016_5	VG016	5	VG016_1	North	8	Shield		0.061	0.983	0.003	74.257	0.466	0.072	8.383	0.029	0.955
VG016_6	VG016	6	na	North	8	Shield		0.048	0.329	0.175	41.262	1.374	0.111	6.442	-0.022	0.578
VG017_1	VG017	1	na	North	8	Shield		0.046	0.337	0.189	38.747	1.452	0.33	8.99	0.016	0.851
VG017_10	VG017	10	VG017_1	North	8	Shield		0.048	0.392	0.171	43.448	1.333	0.886	23.657	0.042	2.739
VG017_11	VG017	11	VG017_1	North	8	Shield		0.05	0.447	0.174	44.036	1.396	1.135	30.368	0.035	3.544
VG017_12	VG017	12	VG017_1	North	8	Shield		0.048	0.446	0.159	45.519	1.33	1.185	30.28	0.03	3.551
VG017_13	VG017	13	VG017_1	North	8	Shield		0.048	0.413	0.158	44.504	1.388	0.958	22.661	0.035	2.621
VG017_14	VG017	14	VG017_1	North	8	Shield		0.046	0.433	0.175	43.6	1.409	1.212	30.794	0.039	3.749
VG017_2	VG017	2	na	North	8	Shield		0.047	0.417	0.182	41.134	1.581	0.568	15.37	0.038	1.415
VG017_3	VG017	3	na	North	8	Shield		0.05	0.508	0.159	46.436	1.358	1.128	30.96	0.017	3.439
VG017_4	VG017	4	na	North	8	Shield		0.051	0.606	0.103	55.707	1.228	0.392	19.916	0.012	2.027
VG017_5	VG017	5	na	North	8	Shield		0.059	0.362	0.118	57.343	0.991	0.451	24.944	0.109	1.707
VG017_6	VG017	6	na	North	8	Shield		0.052	0.416	0.11	53.742	1.36	0.684	28.866	0.035	2.067
VG017_7	VG017	7	na	North	8	Shield		0.071	1.048	0.133	50.709	1.359	0.973	32.31	0.087	3.147
VG017_8	VG017	8	na	North	8	Shield		0.05	0.475	0.083	62.376	1.18	0.387	14.324	0.028	1.869
VG017_9	VG017	9	na	North	8	Shield		0.056	0.491	0.103	62.714	0.821	0.121	6.913	0.038	0.875
VG018_1	VG018	1	na	North	8	Shield		0.057	0.509	0.066	65.489	0.846	0.17	9.124	0.025	0.9
VG018_10	VG018	10	VG018_1	North	8	Shield		0.049	0.412	0.157	50.608	1.256	1.04	28.3	0.098	3.597
VG018_11	VG018	11	VG018_1	North	8	Shield		0.049	0.552	0.156	48.5	1.21	1.124	28.619	0.095	3.617
VG018_12	VG018	12	VG018_1	North	8	Shield		0.049	0.396	0.114	57.243	1.074	0.854	25.349	0.069	3.12
VG018_13	VG018	13	VG018_1	North	8	Shield		0.048	0.426	0.16	49.396	1.295	1.062	30.638	0.081	3.767
VG018_14	VG018	14	VG018_1	North	8	Shield		0.05	0.457	0.156	50.478	1.23	1.061	28.583	0.072	3.611
VG018_2	VG018	2	na	North	8	Shield		0.047	0.36	0.155	49.767	1.171	0.348	16.084	0.032	1.505
VG018_3	VG018	3	na	North	8	Shield		0.054	0.476	-0.011	81.202	0.289	0.269	20.892	0.062	1.217
VG018_4	VG018	4	na	North	8	Shield		0.047	0.41	0.135	55.108	1.164	0.643	30.628	0.017	1.982
VG018_5	VG018	5	na	North	8	Shield		0.049	0.547	0.057	64.497	1.003	0.276	15.249	0.01	0.996
VG018_6	VG018	6	na	North	8	Shield		0.055	0.286	0.029	75.248	0.582	0.265	18.351	0.014	0.899
VG018_7	VG018	7	na	North	8	Shield		0.119	0.723	0.104	54.902	1.6	0.467	19.332	0.064	1.715
VG018_8	VG018	8	na	North	8	Shield		0.065	0.952	0.164	46.426	1.807	0.867	38.061	0.104	4.036
VG018_9	VG018	9	na	North	8	Shield		0.05	0.558	0.137	48.468	1.214	0.212	5.571	0.021	0.702
VG019_1	VG019	1	VG019_1	North	8	Shield		0.054	1.099	0.086	62.324	0.792	0.376	17.902	0.089	1.772
VG019_2	VG019	2	VG019_1	North	8	Shield		0.058	1.236	0.045	67.183	0.663	0.127	8.22	0.059	1.053
VG019_3	VG019	3	VG019_1	North	8	Shield		0.052	0.917	0.148	49.611	1.157	0.573	23.362	0.072	2.44
VG019_4	VG019	4	VG019_1	North	8	Shield		0.052	0.864	0.162	47.647	1.214	0.644	24.655	0.111	2.668
VG019_5	VG019	5	VG019_1	North	8	Shield		0.053	0.958	0.164	48.102	1.211	0.7	27.499	0.141	2.845
VG019_6	VG019	6	na	North	8	Shield		0.056	0.602	0.181	40.384	1.5	0.225	11.384	-0.009	0.998
